# Supplementary material for: Biosynthesis of violacein: a genuine intermediate, protoviolaceinic acid, produced by VioABDE, and insight into VioC function
Source: Royal Society of Chemistry journal article supplement (doi:10.1039/b705358d), 2007-01-01
Supplement: b705358d.pdf [file b705358d.pdf]

## Electronic Supplementary Information (ESI)

### **Biosynthesis of violacein: a genuine intermediate, protoviolaceinic acid, produced by VioABDE, and insights into VioC function and the oxygenation mechanism of the central pyrrole ring.**

Kouhei Shinoda, Takuji Hasegawa, Hiroaki Sato, Masaaki Shinozaki, Hirotomoto Kuramoto, Yosuke Takamiya, Tsutomu Sato, Naoki Nikaidou, Takeshi Watanabe and Tsutomu Hoshino\*

*Department of Applied Biological Chemistry, Faculty of Agriculture, and Graduate School of Science and Technology, Niigata University, Ikarashi, Niigata 950-2181, Japan. Fax: +81-25-262-6854; E-mail: [hoshitsu@agr.niigata-u.ac.jp](mailto:hoshitsu@agr.niigata-u.ac.jp)*

#### Contents

|                                                                                                         |         |
|---------------------------------------------------------------------------------------------------------|---------|
| 1. Construction of <i>vio</i> A, B, C, D and E                                                          | S2      |
| 2. Culture and incubation conditions for the isolations of <b>8</b> and <b>9</b> .                      | S3      |
| 3. Stabilities of intermediate <b>8</b>                                                                 | S5      |
| 4. Electronic spectra against times stood at room temperatures                                          | S6      |
| 5. Production of violacein <b>1</b> under the following conditions:<br>VioABE→EtOAc-extract→VioCD+NADPH | S7      |
| 6. NMR spectra of <b>8</b> measured at -10°C in acetone <i>d</i> <sub>6</sub>                           | S8-S15  |
| 7. NMR assignments of <b>8</b> measured at -10°C in acetone- <i>d</i> <sub>6</sub>                      | S16     |
| 8. EI and FABMS of <b>8</b> .                                                                           | S17     |
| 9. NMR spectra of the methyl ester of <b>8</b> measured at 25°C in acetone <i>d</i> <sub>6</sub>        | S18-S20 |
| 10. NMR assignments of methyl ester of <b>8</b> in acetone- <i>d</i> <sub>6</sub> .                     | S20     |
| 11. EI-LRMS and EI-HRMS of methyl ester of <b>8</b> .                                                   | S21     |
| 12. Electronic spectrum of methyl ester of <b>8</b> in MeOH                                             | S21     |
| 13. NMR spectra of Compound <b>9</b> measured at -10°C in acetone <i>d</i> <sub>6</sub>                 | S22-25  |
| 14. NMR assignments of <b>9</b>                                                                         | S25     |
| 15. EI- and FAB-LRMS of <b>9</b>                                                                        | S26     |
| 16. NMR Spectra of methyl ester of <b>9</b> in acetone <i>d</i> <sub>6</sub>                            | S27-33  |
| 17. NMR assignment of methyl ester of <b>9</b>                                                          | S34     |
| 18. EI-LRMS and EI-HRMS of methyl ester of <b>9</b>                                                     | S34     |
| 19. Electronic spectrum of methyl ester of <b>9</b>                                                     | S35     |

|                                                  |        |
|--------------------------------------------------|--------|
| 20. Homologous alignment of VioA , VioC and VioD | S35-39 |
| 21. FAD cofactor involved in VioA, C and D.      | S40-43 |

### 1. Construction of *vioA*, *B*, *C*, *D*, *E*

All the genes other than *vioB* were PCR-amplified by using a template of plasmid pVBG04, which was cloned by us (accession number AB032799). The following primers were used.

*vioA*:5'-GACATTCCCATATGAAAGCATTCTTCCGATATCTGC-3'

5'-TAAGGATCCTCACGCGGCGATGCGCTGCAGC-3'

*vioC*:5'-GAGGCCTCATATGAAAAGAGCAATAGTCGG-3'

5'-GAAGGATCCTCAGTTGACCCTCCCTATCTTG-3'

*vioD*:5'-GGGTCAACCATATGAAAGATTCTGGTCATCGGCG-3'

5'-GTAGGATCCTCAGCGTTGCAGCGCGTAGC-3'

*vioE*:5'-GAGGAGGCCCATATGGAAAACCGGGAACCGC-3'

5'-GATCGGATCCCTAGCGCTTGCGGCGAAG-3'

*Nde* I and *Bam*H I sites are underlined.

The gene *vioB* was amplified from plasmid pBaSa, which was prepared by digesting pVBG04 with *Bam*H1 and *Sac*I, followed by the ligation into pUC119.

*vioB*:5'- GTTCGGGAAACCATATGAGCATTCTGG -3'

5'- GAGCAATCATAGTCGGATCCGGGCTCGCCG -3'

All the PCR products of *vioABCDE* were digested with *Nde* I /*Bam*H I and then ligated into pET3a (*vioE*) and pET12b (*vioA*,*B*,*C*, and *D*), which were transformed into *E. coli* BL21(DE3) for the overexpression of each protein. These plasmids were used in the cell-free experiments.

To purify the VioACDE with a Ni-NTA column, pET16b harboring *vioA*,*C*,*D*, and *E* and pET22b harboring *vioB* were constructed. These expressed proteins have His-tags.

The pET22b with *vioB* was constructed by PCR-amplification from plasmid pVBG04. The following primers were employed:

*vioB*:5'- CGGGAAACATATGAGCATTCTGGATTTTCCACGC-3'

5'- TCTTTTCAGAGCTCGCCTCTCTAGAAAGC-3'

The PCR products were digested with *Nde* I /*Sac* I and then ligated into pET22b.

All the pET vectors thus constructed were transformed into *E. coli* BL21(DE3).

## 2. Culture and incubation conditions for the isolations of **8** and **9**.

For the isolation of **8**, each of the cell-free extracts of Vio ABCDE was prepared as follows. *E. coli* BL 21 encoding each of the Vio ABCDE was grown at 37°C in 100 mL of Luria Broth medium with ampicillin (5 mg/ 100 ml). Expression of the recombinant protein was induced by adding 200 µl of 0.1M IPTG when the optical density at 600 nm reached about 0.5. The cultivation was continued for an additional 10 h at 25°C. To the pellets collected after the centrifugation, was added 20 ml of 0.2M NH<sub>4</sub>Cl-buffer solution (pH 8.5), and then subjected to ultrasonication to disrupt cells. The supernatant was used as the enzyme source. The protein concentration of each enzyme solution were roughly estimated to be 0.6, 0.25, 0.58, 0.65 and 0.13 µM for VioA, B, C, D, E, respectively. These amounts were presumed by the calculation from the protein amounts that were recovered after the purification with Ni-NTA column, thus the values may not indicate the exact amounts of the expressed proteins. The combined cell-free solutions of VioABCD (83 ml each) were added to Trp (50 mg) and NADPH (150 mg) dissolved in 10 ml of NH<sub>3</sub>-buffer solution (pH 8.5) and incubated for 1 h at 25°C on the rotary shaker at 120 rpm. The aerial condition (O<sub>2</sub>) is necessary for the production of **1**. The biosynthetic intermediate **8** was extracted with EtOAc (250 ml), which quickly dried over Na<sub>2</sub>SO<sub>4</sub> and evaporated into a small volume, but never dried (dryness causes the decomposition), followed by a column chromatography over SiO<sub>2</sub> with 100% EtOAc. To examine which fraction contained **8**, a portion of each fraction, separated by the SiO<sub>2</sub> column, was incubated with the cell-free extract of VioC. The fractions giving **1** (bluish color) were combined, followed by HPLC (C<sub>18</sub>) with MeOH:H<sub>2</sub>O (45:55). The peaks were monitored at 254 nm. Next procedure for the NMR measurement was described in the main text. For the isolation of **9**, the mixed cell-free system of VioABE was used. Other procedures were the same as those of **8**, but no NADPH was added to the VioABE mixture, because NADPH is not required for the enzyme activities of VioA, VioB and VioE. HPLC (C<sub>18</sub>) was carried out with MeOH:20mM NH<sub>3</sub>-buffer (pH 8.5)=45:55. The retention times of **8** and **9** with this NH<sub>3</sub>-buffer system was significantly shorter,

compared to those with MeOH:H<sub>2</sub>O (45:55) (Fig. S1), further indicating that **8** and **9** involve a carboxyl group. Fig. S1 shows the HPLC (C<sub>18</sub>) profiles of the EtOAc-extract from the incubation mixture by VioABDE. VioD is a monooxygenase that hydroxylate at 6-position of **9** to afford **8**. If a sufficient amount of VioD exists, no production of **9** would have been found, that is, **8** only would have been produced.

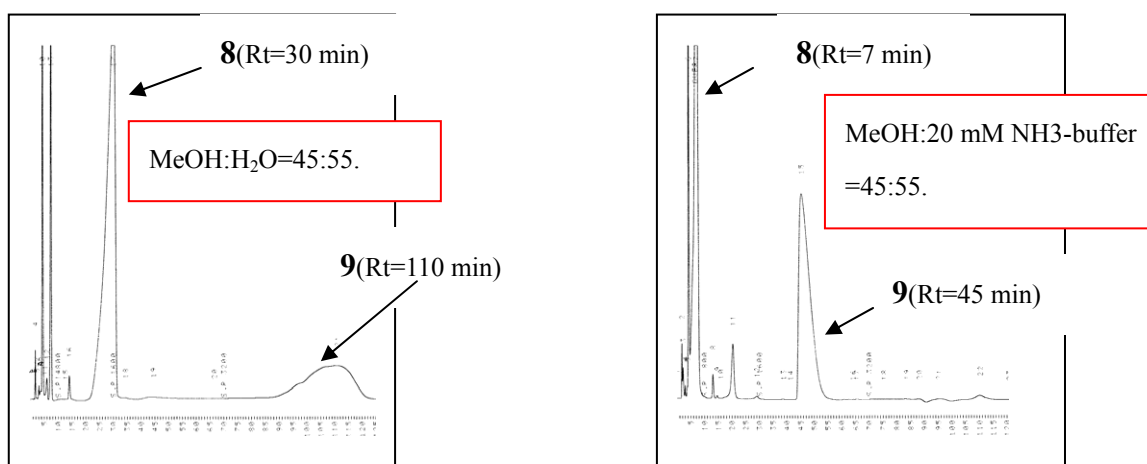

**Fig. S1.** HPLC patterns of the EtOAc-extract from VioABDE.

Left: MeOH:H<sub>2</sub>O=45:55; Right: MeOH: 20 mM NH<sub>3</sub>-buffer=45:55.

Details for the experiments of Fig. 2 (main text), Fig. S2 and Fig. S3.

The cell-free extracts (60 ml each) were separately obtained from 300-ml culture of VioA, B, C, D and E. For each of the experiments, 0.5 ml of each of the cell-free extracts was used. When NADPH is required, 2.25 mg was added to the incubation mixture. The EtOAc-extract (usually 4 ml) contains **8** or **9** was quickly concentrated to a small volume (usually ca 20  $\mu$ l; first: by rotary evaporator, 2<sup>nd</sup>: by passing a stream of N<sub>2</sub> gas), which was added to VioC or VioCD, then further incubated at 25°C for 12 h on a rotary shaker at 120 rpm, yielding bluish-purple violacein **1**. To the incubation mixtures, EtOAc was added in order to extract the blue pigments thus produced. The EtOAc solution was evaporated to dryness. The production amounts of **1** were monitored at 570 nm after dissolving the residues in MeOH (5 ml).

### 3. Stabilities of intermediate **8**.

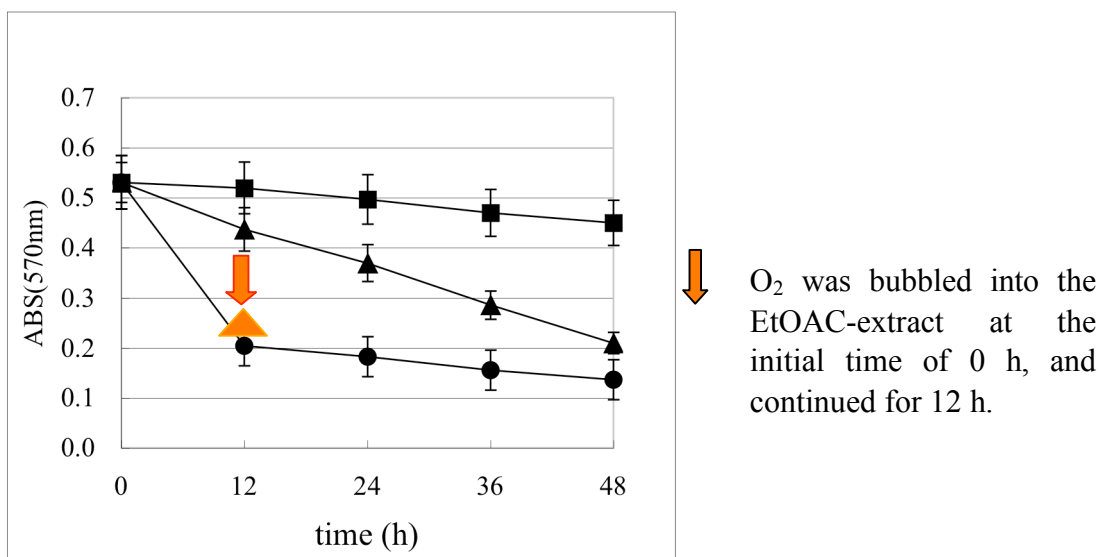

**Fig. S2.** Stability of intermediate **X (8)** in the solution of EtOAc, when stood at -20°C (■) and at 25°C (▲). The symbol (●) shows the stability when the EtOAc solvent was dried. The stabilities were determined by estimating **1** produced by adding VioC in the presence of NADPH. The symbol (↔) indicates the stability of intermediate **X** after bubbling O<sub>2</sub> into the EtOAc solution. This experiment shows that the intermediate **8** is very labile to O<sub>2</sub>. The stability of **8** in the EtOAc solution is higher than that of culturing in the LB-medium (compare Fig.S2 with Fig. 2 of the main text). This is due to the higher concentration of the dissolved O<sub>2</sub> in the culture medium, because the rotary shaking is being carried out in the experiment of Fig. 2 of the main text.

#### 4. Electronic spectra against times stood at room temperatures.

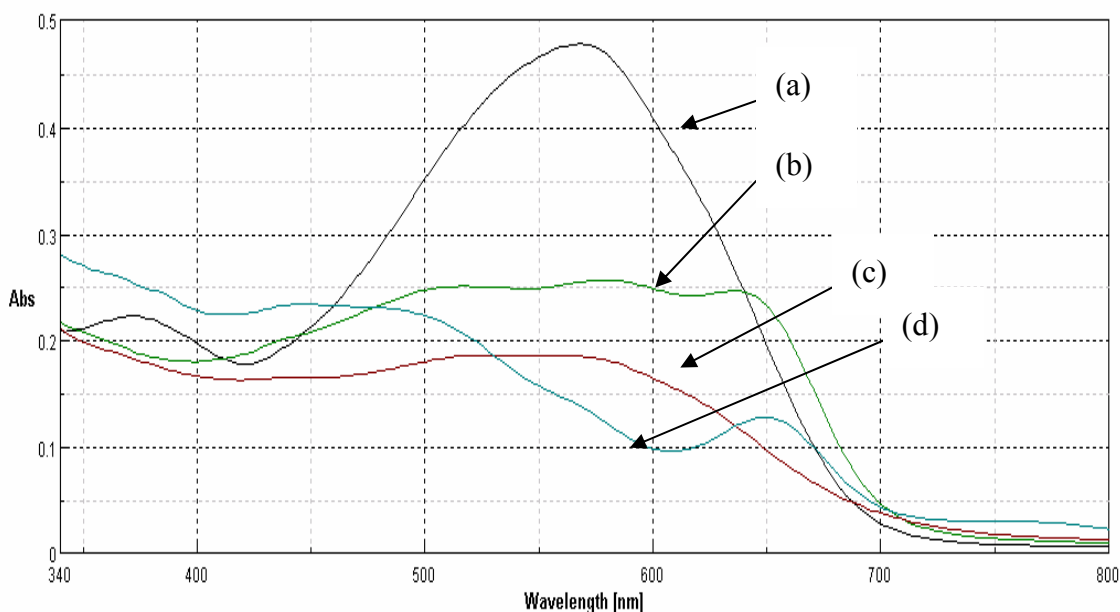

**Fig. S3.** Visible spectra of the pigments produced by adding VioC into the EtOAc-extract containing **8**. The produced pigments were **1,2,6** and **7** (see Fig. 3 of the main text). The pigments were extracted with EtOAc from the incubation mixture, and then dissolved in MeOH. Note that **1,2,6** and **7** are stable compounds, differing from intermediates **8** and **9**.

(a): The EtOAc solution containing **8** was stood for 12 h at 25°C, followed by addition of VioC in the presence of NADPH to give violacein **1**. Then the pigments thus produced were extracted with EtOAc and the spectrum was measured in MeOH. This spectrum (the shape and  $\lambda_{\text{max}}$ ) is identical to that of authentic **1**.

(b): To the EtOAc-extract containing **8**, O<sub>2</sub> gas was bubbled for 12 h at 25°C, followed by addition of VioC in the presence of NADPH. Then the pigments thus produced were extracted with EtOAc and the spectrum was measured in MeOH.

(c): The EtOAc solution containing **8** was dried and stood for 12 h at 25°C (the exposure to air), followed by addition of VioC in the presence of NADPH. Then the pigments thus produced were extracted with EtOAc and the spectrum was measured in MeOH.

(d): The EtOAc solution containing **8** was dried and stood for 48 h at 25°C (the exposure to air), followed by addition of VioC in the presence of NADPH. Then the pigments thus produced were extracted with EtOAc and the spectrum was measured in MeOH. (c) is different from (d) only regarding the exposure time to air: (c), 12 h; (d), 48h.

Note that the visible spectra of (b), (c) and (d) are significantly different from that of violacein pigment **1** (a). TLC analysis showed that large amounts of **6** and **7** were produced in the experiments of (b), (c) and (d) (see Fig. 2 of the main text).

### 5. Production of violacein **1** under the following conditions:

**VioABE**→EtOAc-extract→VioCD+NADPH.

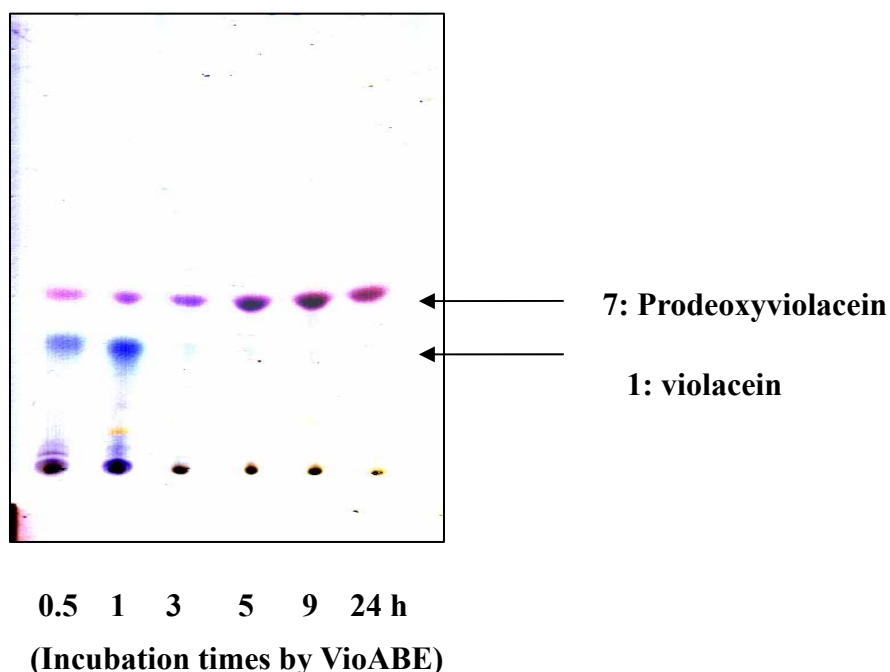

**Fig. S4.** SiO<sub>2</sub>-TLC developed four times with MeOH:CHCl<sub>3</sub> (9: 0.5). Trp was incubated with VioABE for different incubation times (0.5-24 h). The EtOAc-extract obtained from each of incubation times was added to the mixture of VioC in the presence of NADPH, giving rise to violacein **1**. However, the production of **1** was observed only from incubating for 0.5-1 h with VioABE. Longer incubation (> 3h) did not afford **1**, but the production amount of **7**, in turn, was relatively increased with the longer incubation times (>5 h). In this experiment, no production of proviolacein **6** was found, indicating that prodeoxyviolacein **7** is not converted into **6** by VioD.

## 6. NMR spectra of **8** measured at $-10^{\circ}\text{C}$ in acetone $d_6$ (600 MHz, Bruker DMX600)

$^1\text{H}$  NMR

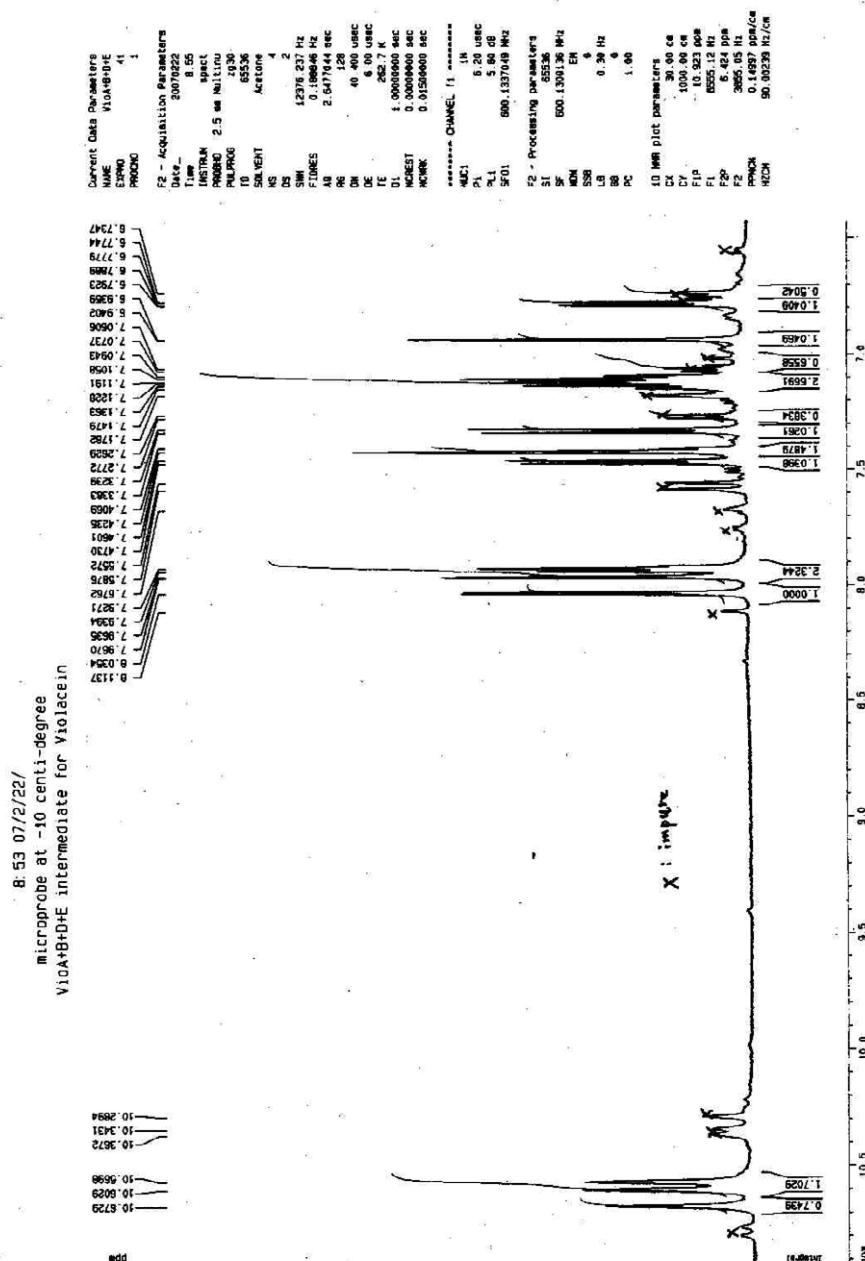

**Remark:** In the  $^1\text{H}$  and  $^{13}\text{C}$  NMR spectra, some peaks from the impurity were observed. This is due to instability of **8**, but in case of the methyl ester of **8**, no decomposition occurred, thus the NMR signals from the impurity were minimum.



<sup>13</sup>C NMR

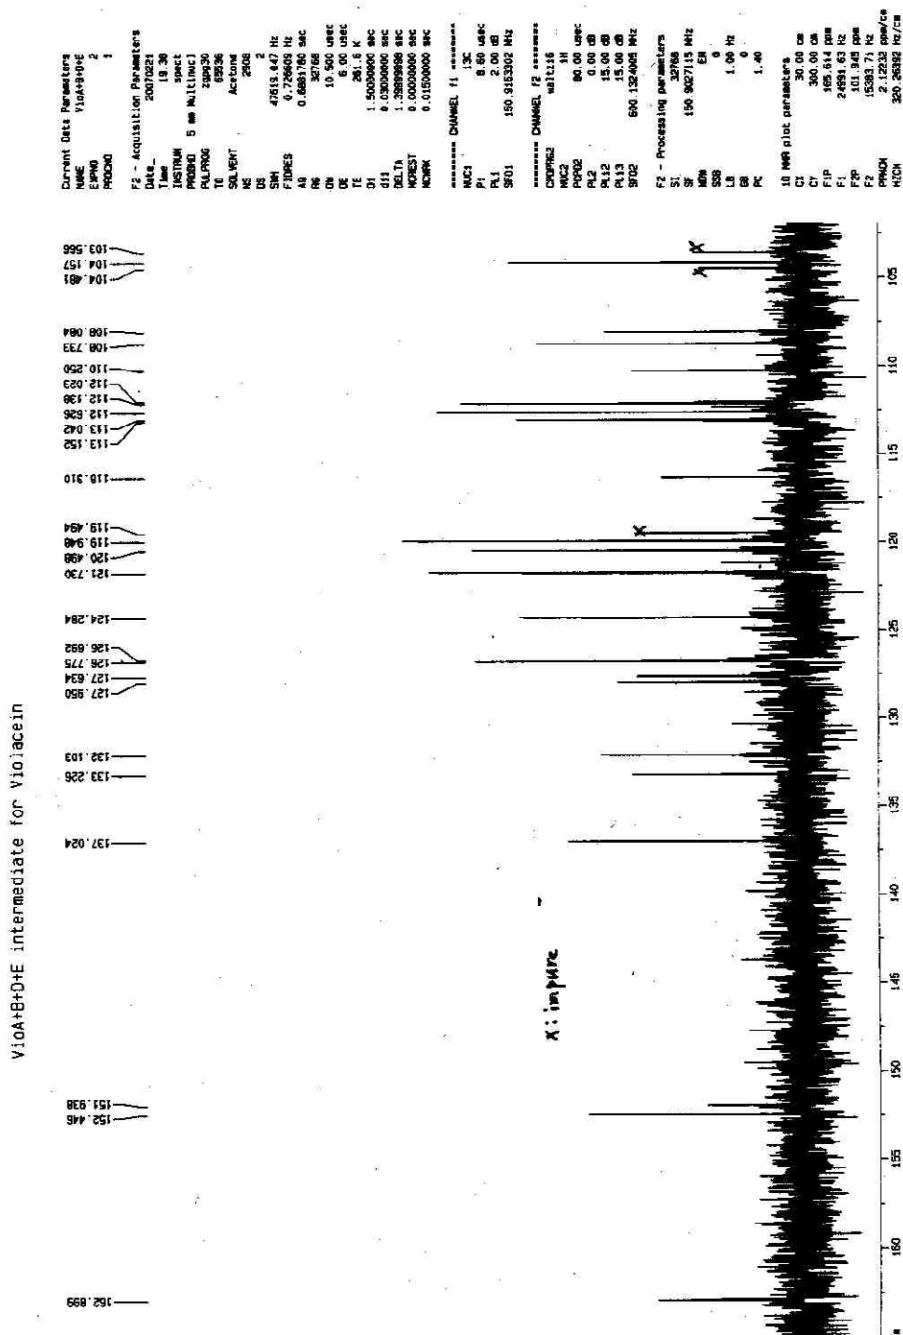

DEPT 135

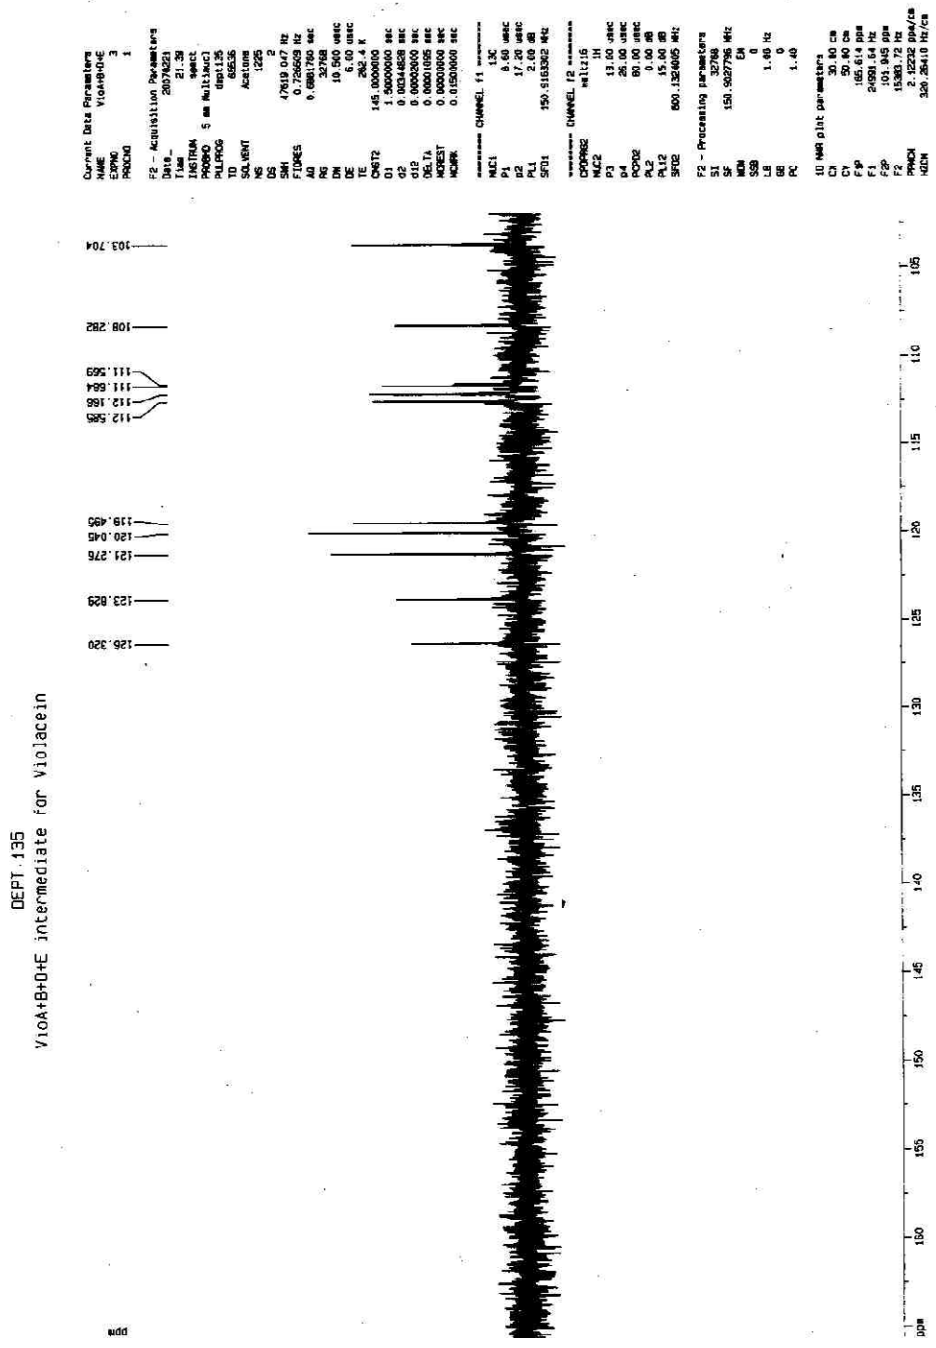

COSY 90

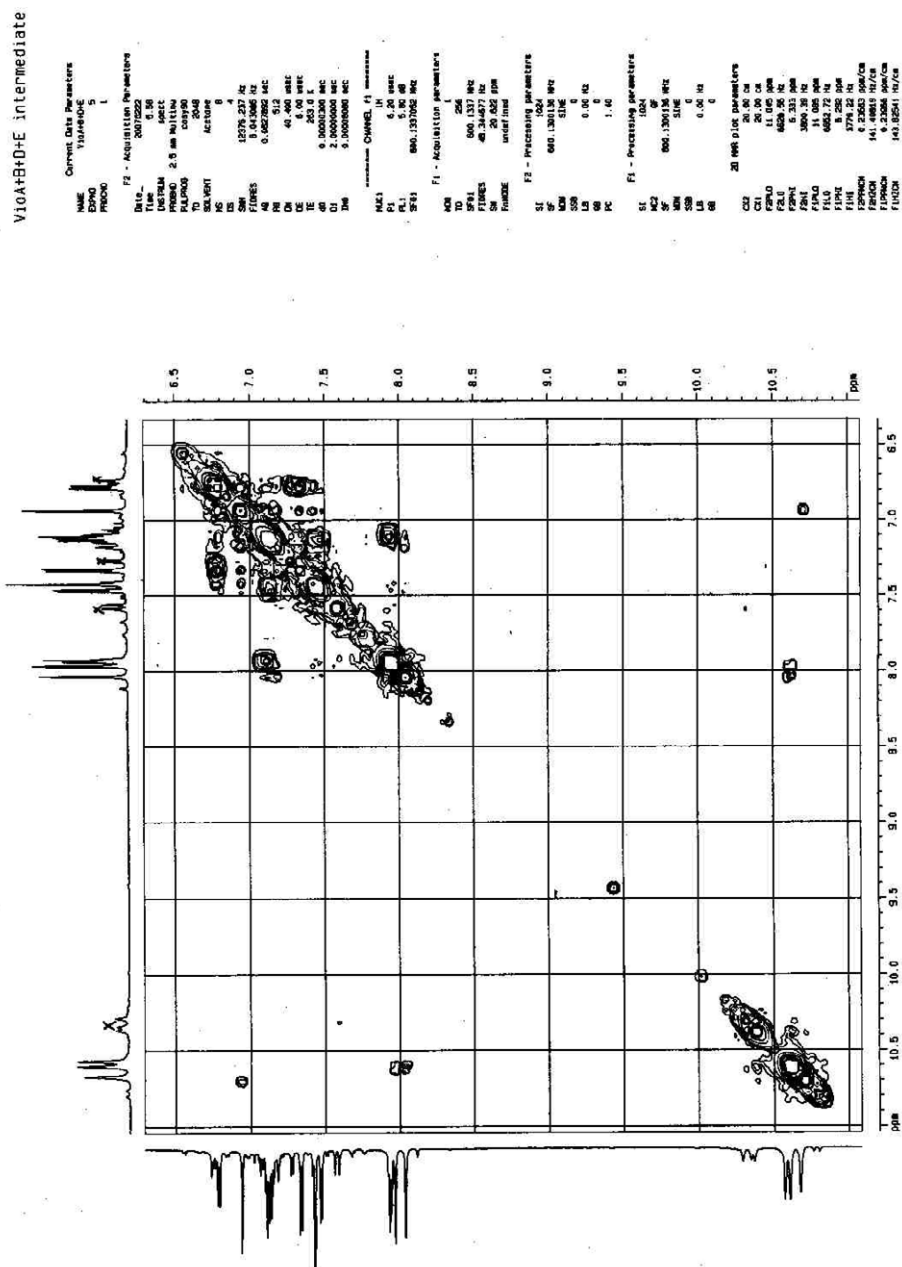

HOHAHA

VioA+B+D+E intermediate for VIOLACEIN

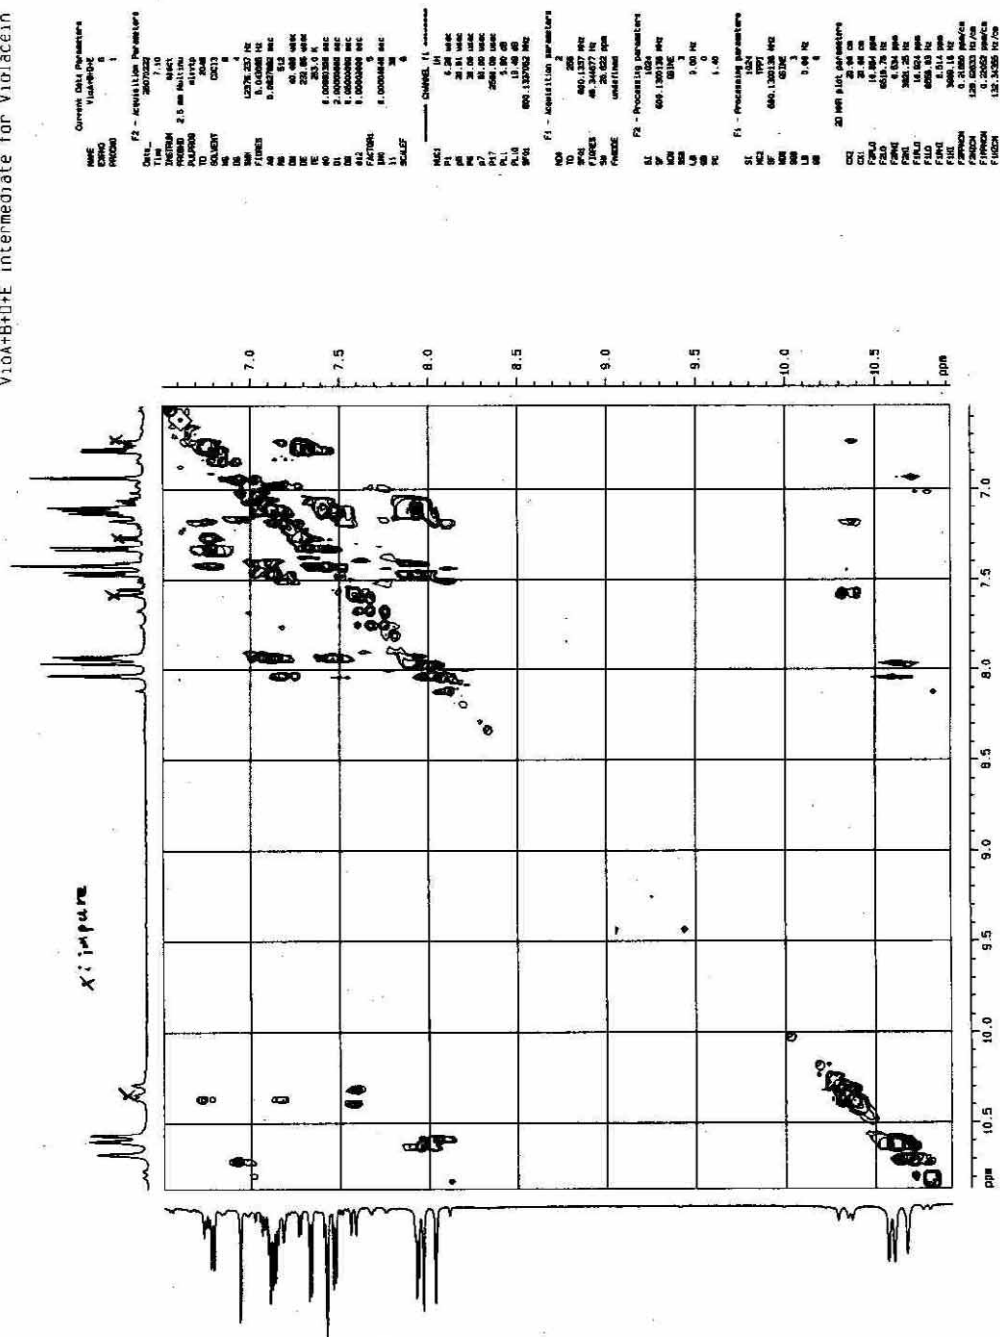

Current Data Parameters  
 NAME: VioA+B+D+E  
 PROTON: 1  
 Date\_: 20070222  
 F2 - Acquisition Parameters  
 Time: 7.10  
 PULPROG: zgpg30  
 PROCNO: 1  
 FIDRES: 0.000000  
 AQ: 0.000000  
 SFO: 400.146400  
 TO: 1.000000  
 TD: 65536  
 F2: 400.146400  
 F1: 100.628200  
 SFO1: 100.628200  
 F1 - Acquisition Parameters  
 NO: 2  
 TO: 200  
 FIDRES: 0.000000  
 SFO: 400.146400  
 F2: 100.628200  
 F1: 100.628200  
 F2 - Processing parameters  
 SI: 32768  
 SF: 400.146400  
 DS: 4  
 AS: 0  
 SC: 0  
 SD: 0  
 SN: 3  
 SSB: 0  
 GB: 0  
 PC: 1.00  
 F1 - Processing parameters  
 SI: 16384  
 SF: 100.628200  
 DS: 4  
 AS: 0  
 SC: 0  
 SD: 0  
 SN: 3  
 SSB: 0  
 GB: 0  
 PC: 1.00  
 2D NMR Parameters  
 CQ: 0  
 F1P1: 100.628200  
 F1P2: 100.628200  
 F1P3: 100.628200  
 F1P4: 100.628200  
 F1P5: 100.628200  
 F1P6: 100.628200  
 F1P7: 100.628200  
 F1P8: 100.628200  
 F1P9: 100.628200  
 F1P10: 100.628200  
 F1P11: 100.628200  
 F1P12: 100.628200  
 F1P13: 100.628200  
 F1P14: 100.628200  
 F1P15: 100.628200  
 F1P16: 100.628200  
 F1P17: 100.628200  
 F1P18: 100.628200  
 F1P19: 100.628200  
 F1P20: 100.628200  
 F1P21: 100.628200  
 F1P22: 100.628200  
 F1P23: 100.628200  
 F1P24: 100.628200  
 F1P25: 100.628200  
 F1P26: 100.628200  
 F1P27: 100.628200  
 F1P28: 100.628200  
 F1P29: 100.628200  
 F1P30: 100.628200  
 F1P31: 100.628200  
 F1P32: 100.628200  
 F1P33: 100.628200  
 F1P34: 100.628200  
 F1P35: 100.628200  
 F1P36: 100.628200  
 F1P37: 100.628200  
 F1P38: 100.628200  
 F1P39: 100.628200  
 F1P40: 100.628200  
 F1P41: 100.628200  
 F1P42: 100.628200  
 F1P43: 100.628200  
 F1P44: 100.628200  
 F1P45: 100.628200  
 F1P46: 100.628200  
 F1P47: 100.628200  
 F1P48: 100.628200  
 F1P49: 100.628200  
 F1P50: 100.628200  
 F1P51: 100.628200  
 F1P52: 100.628200  
 F1P53: 100.628200  
 F1P54: 100.628200  
 F1P55: 100.628200  
 F1P56: 100.628200  
 F1P57: 100.628200  
 F1P58: 100.628200  
 F1P59: 100.628200  
 F1P60: 100.628200  
 F1P61: 100.628200  
 F1P62: 100.628200  
 F1P63: 100.628200  
 F1P64: 100.628200  
 F1P65: 100.628200  
 F1P66: 100.628200  
 F1P67: 100.628200  
 F1P68: 100.628200  
 F1P69: 100.628200  
 F1P70: 100.628200  
 F1P71: 100.628200  
 F1P72: 100.628200  
 F1P73: 100.628200  
 F1P74: 100.628200  
 F1P75: 100.628200  
 F1P76: 100.628200  
 F1P77: 100.628200  
 F1P78: 100.628200  
 F1P79: 100.628200  
 F1P80: 100.628200  
 F1P81: 100.628200  
 F1P82: 100.628200  
 F1P83: 100.628200  
 F1P84: 100.628200  
 F1P85: 100.628200  
 F1P86: 100.628200  
 F1P87: 100.628200  
 F1P88: 100.628200  
 F1P89: 100.628200  
 F1P90: 100.628200  
 F1P91: 100.628200  
 F1P92: 100.628200  
 F1P93: 100.628200  
 F1P94: 100.628200  
 F1P95: 100.628200  
 F1P96: 100.628200  
 F1P97: 100.628200  
 F1P98: 100.628200  
 F1P99: 100.628200  
 F1P100: 100.628200

NOESY

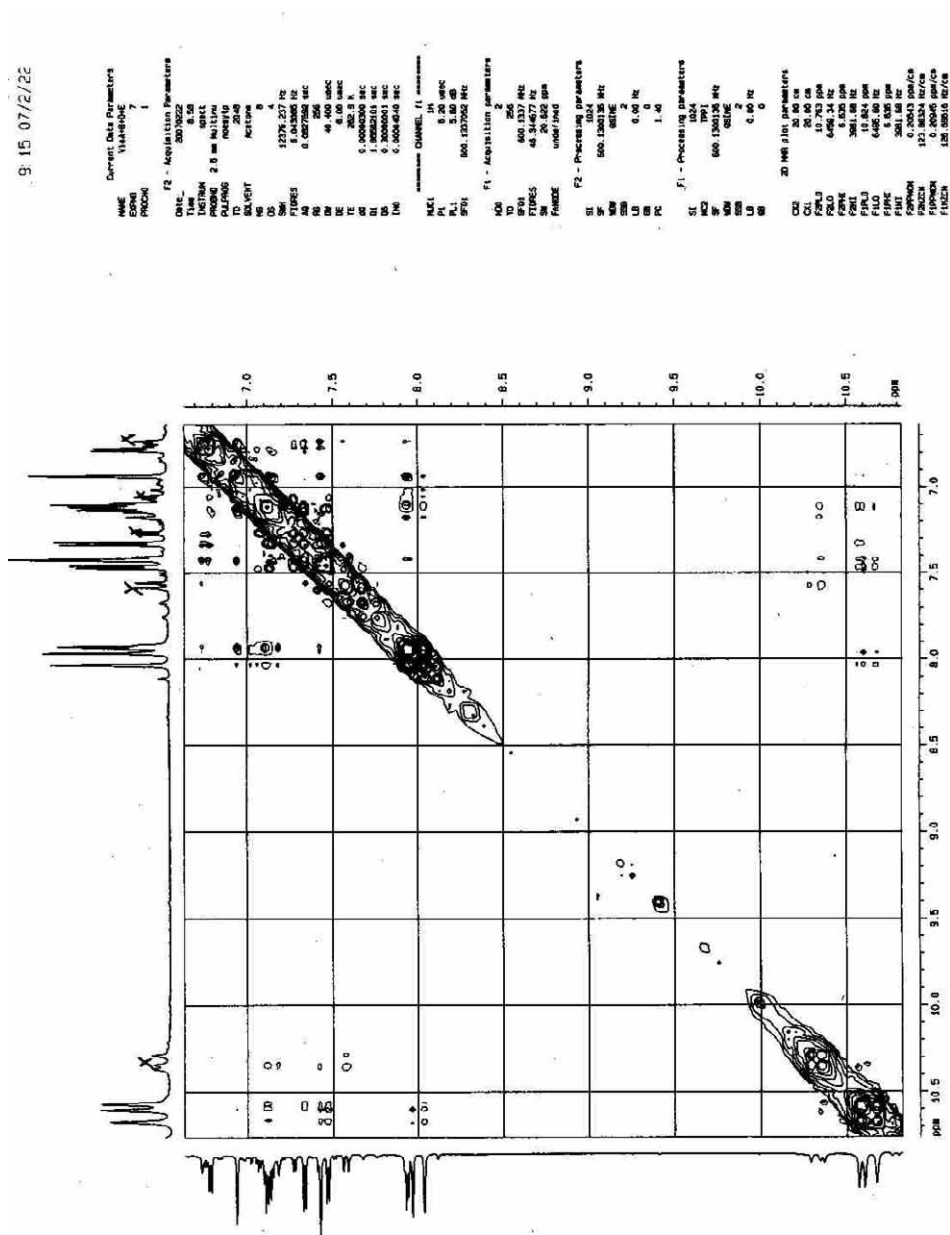

HMQC

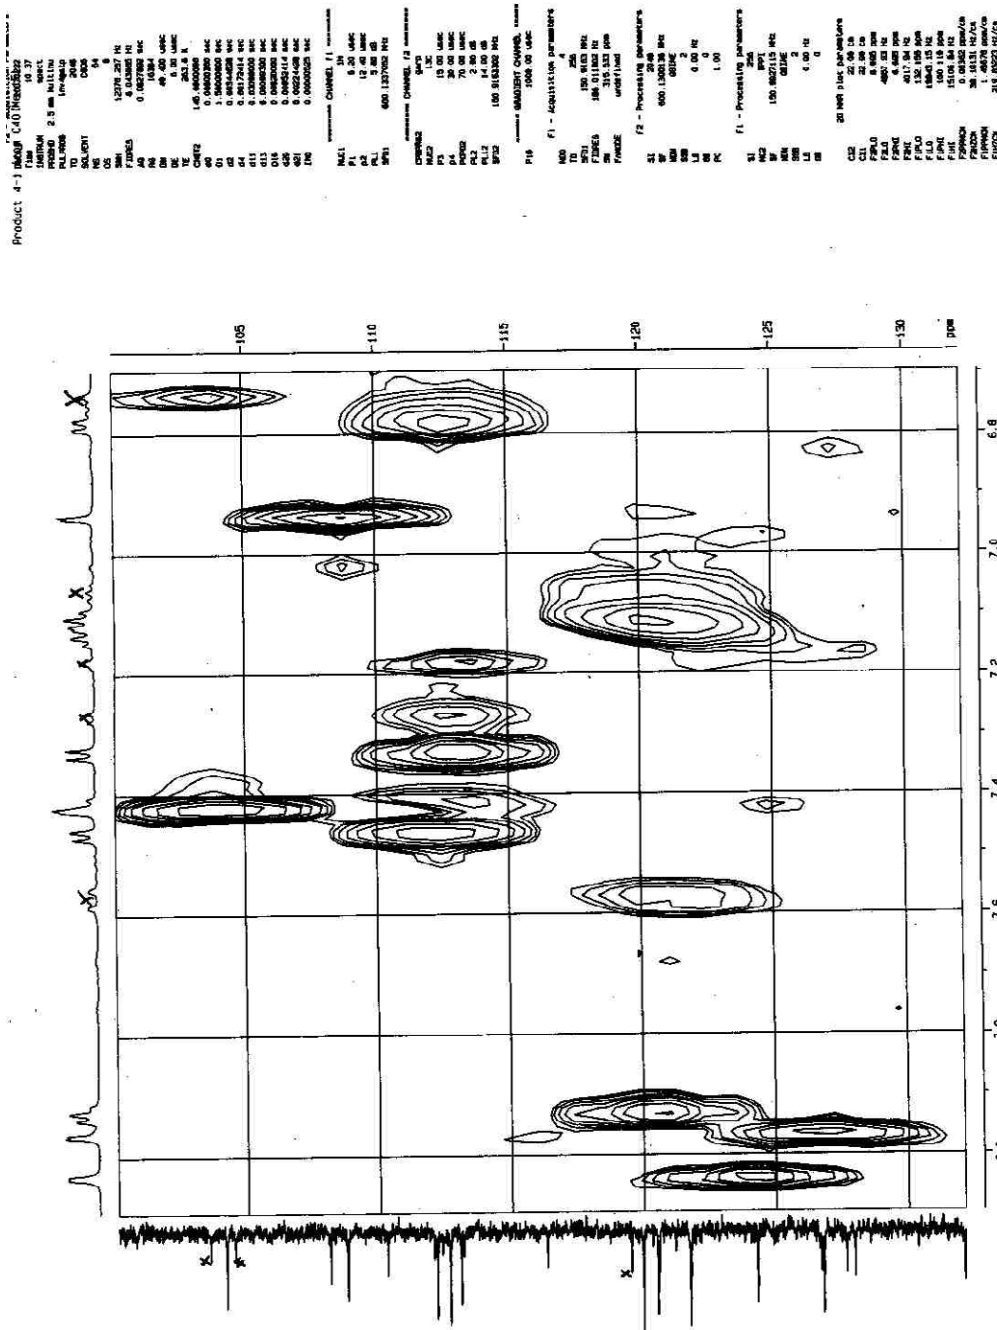

HMBC

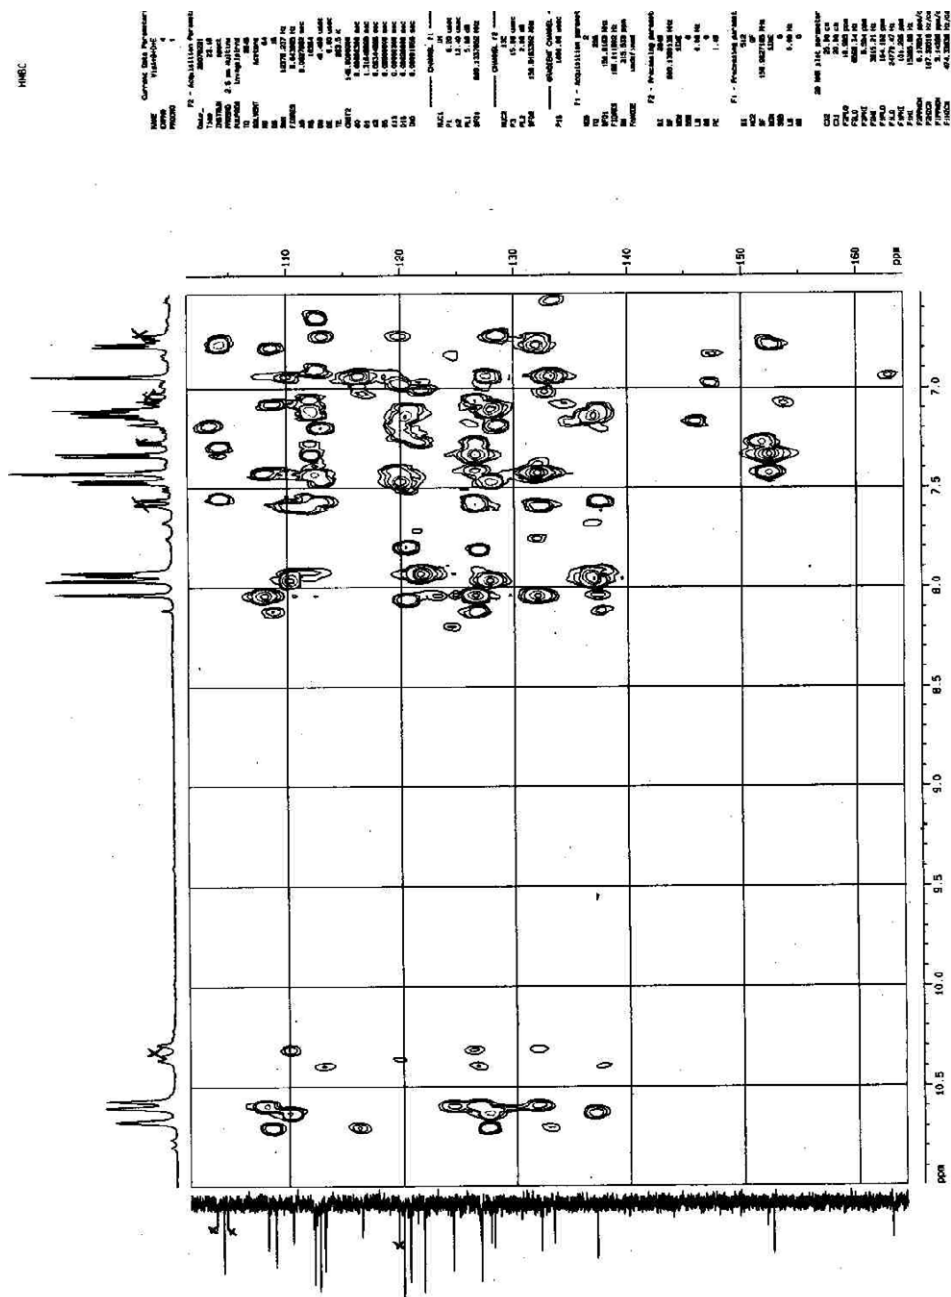

### 7. NMR assignments of **8** measured at $-10^{\circ}\text{C}$ in acetone- $d_6$ .

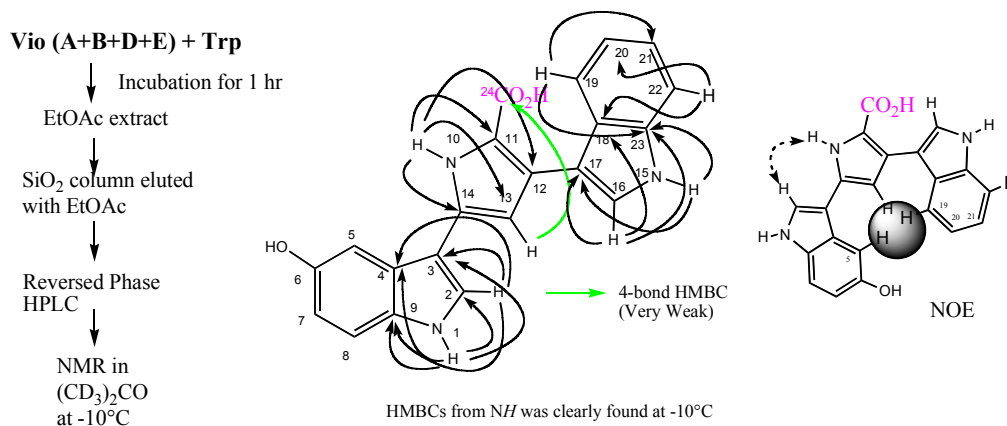

Measured at  $-10^{\circ}\text{C}$  in acetone- $d_6$  with 600 MHz  $\delta_{\text{H}}$  and  $\delta_{\text{C}}$  were given in relative to the solvent peaks of 2.04 ppm and 29.8 ppm

| No | <sup>1</sup> H | <sup>13</sup> C | No | <sup>1</sup> H       | <sup>13</sup> C | No | <sup>1</sup> H | <sup>13</sup> C    | No | <sup>1</sup> H | <sup>13</sup> C | No | <sup>1</sup> H | <sup>13</sup> C |
|----|----------------|-----------------|----|----------------------|-----------------|----|----------------|--------------------|----|----------------|-----------------|----|----------------|-----------------|
| 1  | 10.57 (bs, NH) | —               | 6  | —                    | 152.4           | 11 | —              | 127.6 <sup>a</sup> | 16 | 7.95(d, 2.1Hz) | 126.8           | 21 | 7.14(t, 7.5Hz) | 121.7           |
| 2  | 8.03(d, 2.0Hz) | 124.3           | 7  | 6.77(dd, 2.0, 8.6Hz) | 112.6           | 12 | —              | 116.3 <sup>a</sup> | 17 | —              | 110.2           | 22 | 7.47(d, 7.5Hz) | 112.1           |
| 3  | —              | 108.1           | 8  | 7.33(d, 8.6Hz)       | 113.0           | 13 | 6.94(d, 2.5Hz) | 108.7              | 18 | —              | 127.9           | 23 | —              | 137.0           |
| 4  | —              | 126.7           | 9  | —                    | 132.1           | 14 | —              | 133.2              | 19 | 7.93(d, 7.5Hz) | 120.5           | 24 | —              | 162.9           |
| 5  | 7.42(d, 2.2Hz) | 104.1           | 10 | 10.67(bs, NH)        | —               | 15 | 10.60(bs, NH)  | —                  | 20 | 7.11(t, 7.5Hz) | 119.9           |    |                |                 |

<sup>a</sup>: The chemical shifts of C11, C12 may be exchangeable

NMR spectra were recorded in acetone  $d_6$  on a Bruker DMX 600 spectrometer, the chemical shifts being relative to the solvent peak  $\delta_{\text{H}}$  2.04 and  $\delta_{\text{C}}$  29.8 ppm as the internal reference for <sup>1</sup>H- and <sup>13</sup>C NMR spectra, respectively.



## 8 EI- and FAB-MS of 8.

### 8-1. EI-LRMS (70 eV)

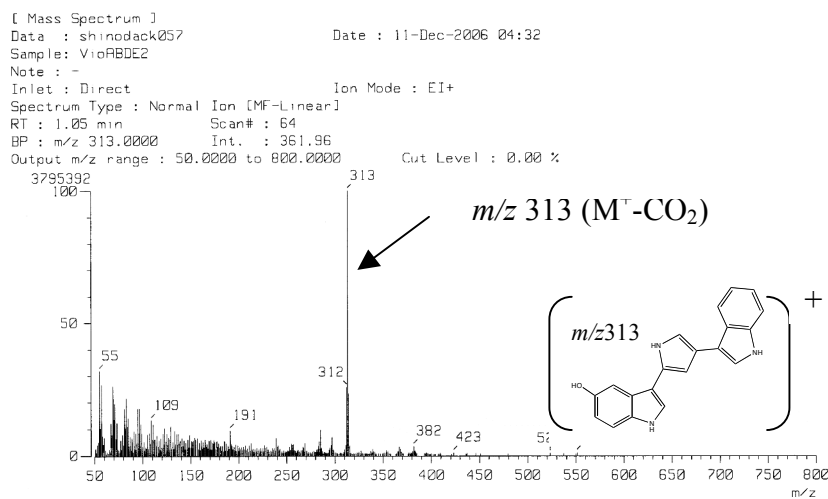

### 8-2. FAB-LRMS (negative, glycerol matrix)

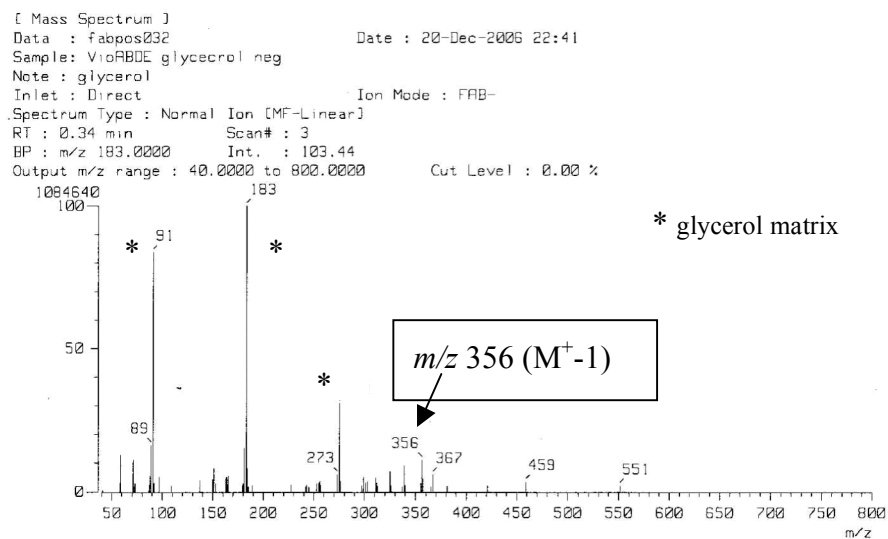

### 9. NMR spectra of the methyl ester of 8 measured at 25°C in acetone *d*<sub>6</sub>

<sup>1</sup>H-NMR (600 MHz)

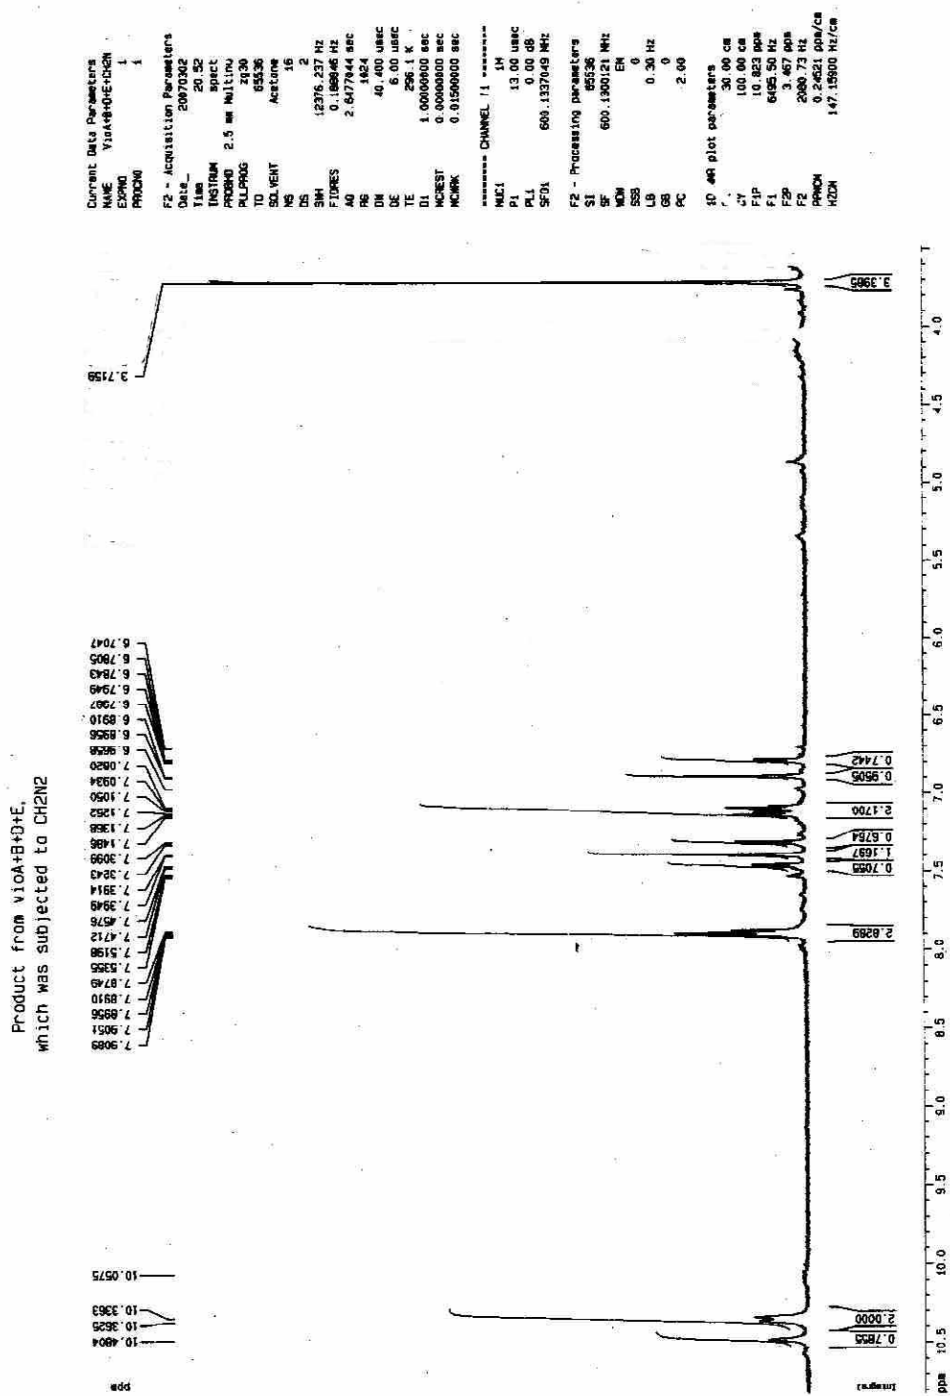

**COSY 90**

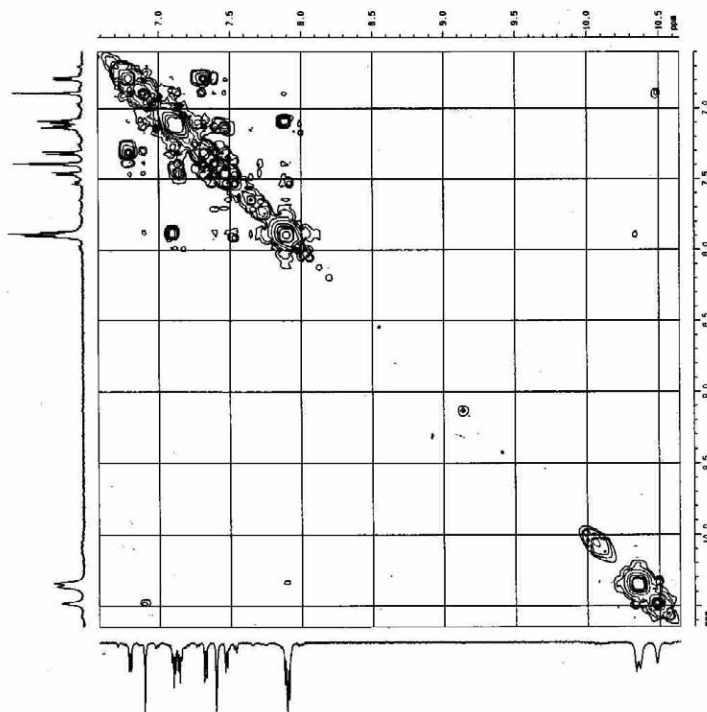

**HMQC**

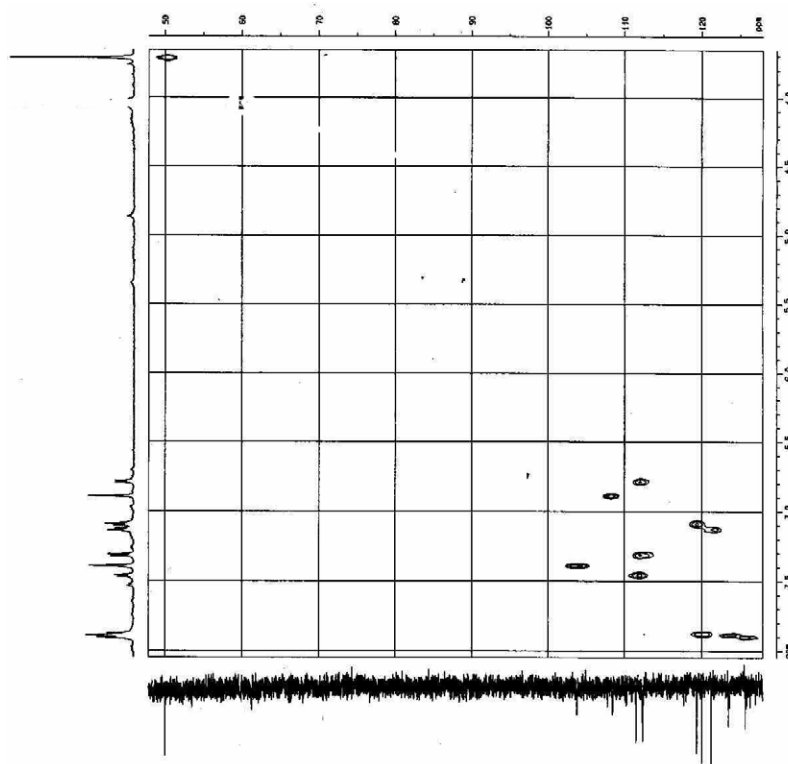

## HMBC

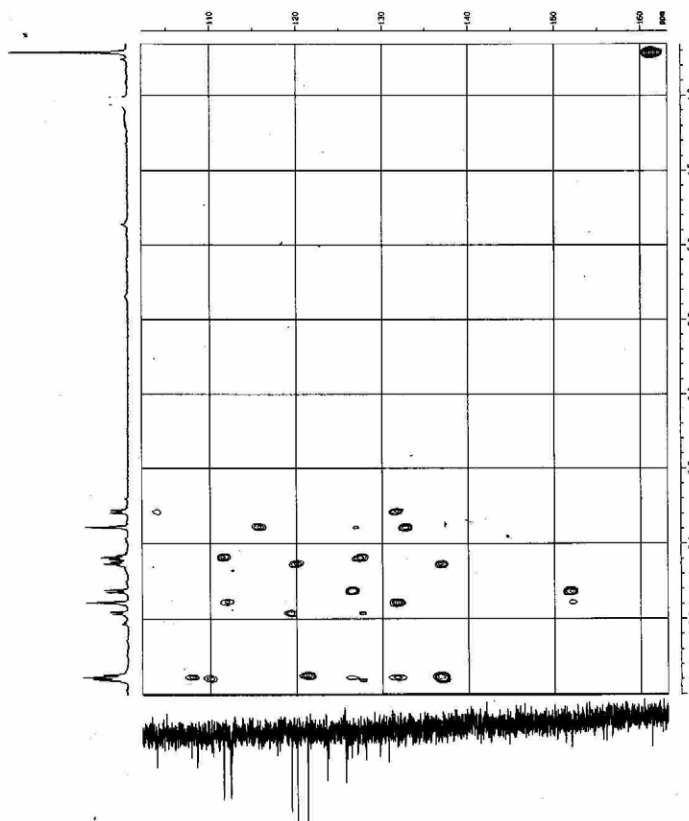

### 10. NMR assignments of methyl ester of 8 in acetone-*d*<sub>6</sub>.

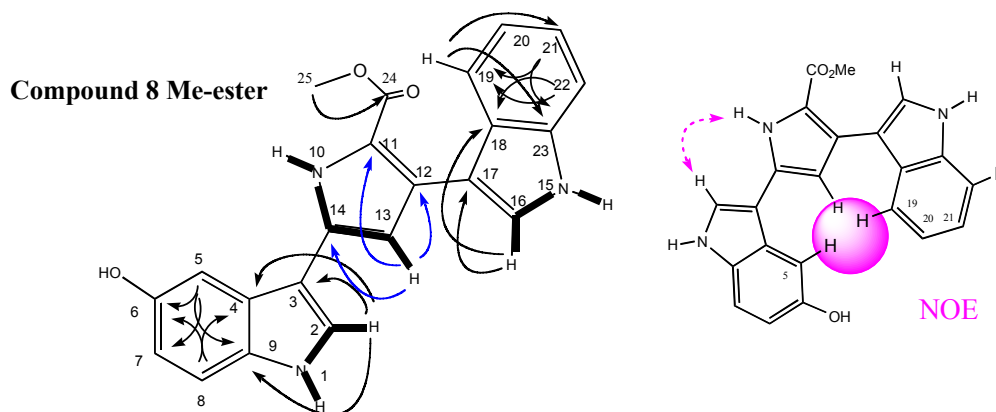

| No | <sup>1</sup> H | <sup>13</sup> C | No | <sup>1</sup> H       | <sup>13</sup> C | No | <sup>1</sup> H | <sup>13</sup> C    | No | <sup>1</sup> H  | <sup>13</sup> C | No | <sup>1</sup> H  | <sup>13</sup> C |
|----|----------------|-----------------|----|----------------------|-----------------|----|----------------|--------------------|----|-----------------|-----------------|----|-----------------|-----------------|
| 1  | 10.34(brs)     | —               | 6  | —                    | 151.7           | 11 | —              | 126.6 <sup>a</sup> | 16 | 7.90(d, 2.3Hz)  | 125.7           | 21 | 7.14(bt, 8.1Hz) | 121.2           |
| 2  | 7.89(d, 2.7Hz) | 123.5           | 7  | 6.79(dd, 8.6, 2.1Hz) | 112.3           | 12 | —              | 116.3 <sup>a</sup> | 17 | —               | 109.9           | 22 | 7.46(d, 8.1Hz)  | 111.5           |
| 3  | —              | 107.8           | 8  | 7.31(d, 8.6Hz)       | 112.4           | 13 | 6.89(d, 2.7Hz) | 108.5              | 18 | —               | 127.5           | 23 | —               | 136.6           |
| 4  | —              | 126.4           | 9  | —                    | 131.4           | 14 | —              | 133.5              | 19 | 7.88(d, 8.1Hz)  | 120.0           | 24 | —               | 162.9           |
| 5  | 7.39(d, 2.2Hz) | 103.8           | 10 | 10.48(bs)            | —               | 15 | 10.36(bs)      | —                  | 20 | 7.09(bt, 8.1Hz) | 119.4           | 25 | 3.71(3H,s)      | 50.02           |

<sup>a</sup>: The carbon assignments may be exchangeable.

### 11. EI-LRMS and EI-HRMS of methyl ester of 8.

HREIMS:  $C_{22}H_{17}O_3N_2$ , Calcd 371.1270, Found 371.1273

EIMS spectra were on a JEOL SX 100 spectrometer under electronic impact at 70 eV (by direct inlet system).

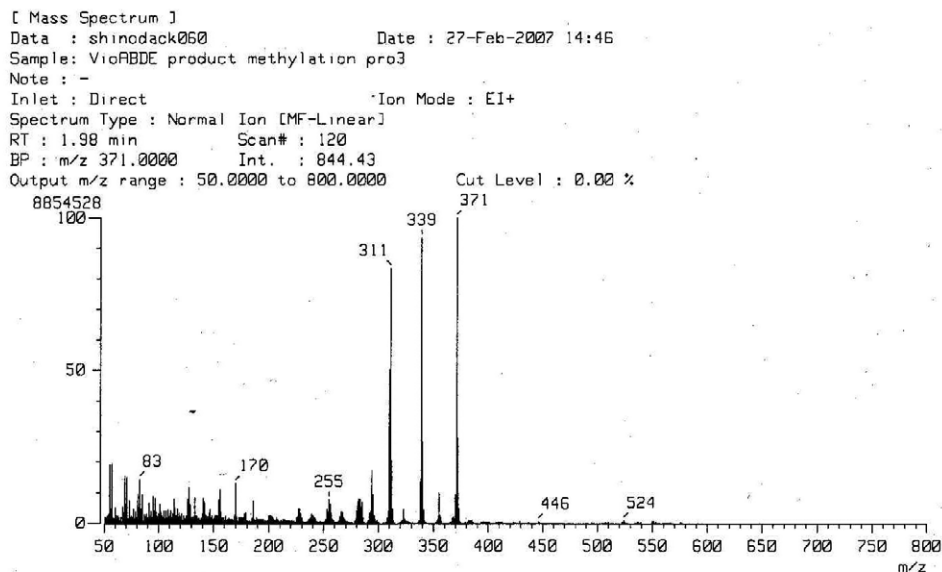

### 12. Electronic spectrum of methyl ester of 8 in MeOH

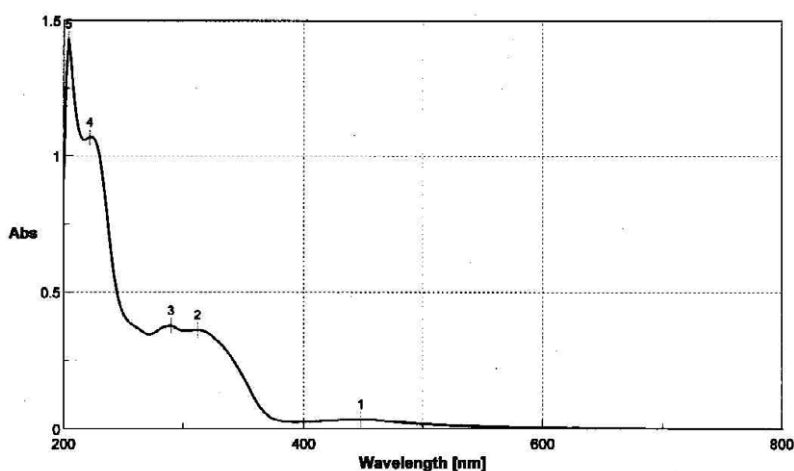

Optical pathlength; 1 cm, Concentration 0.330 mg/50 ml MeOH

### 13. NMR spectra of Compound 9 measured at -10°C in acetone $d_6$

#### $^1\text{H-NMR}$

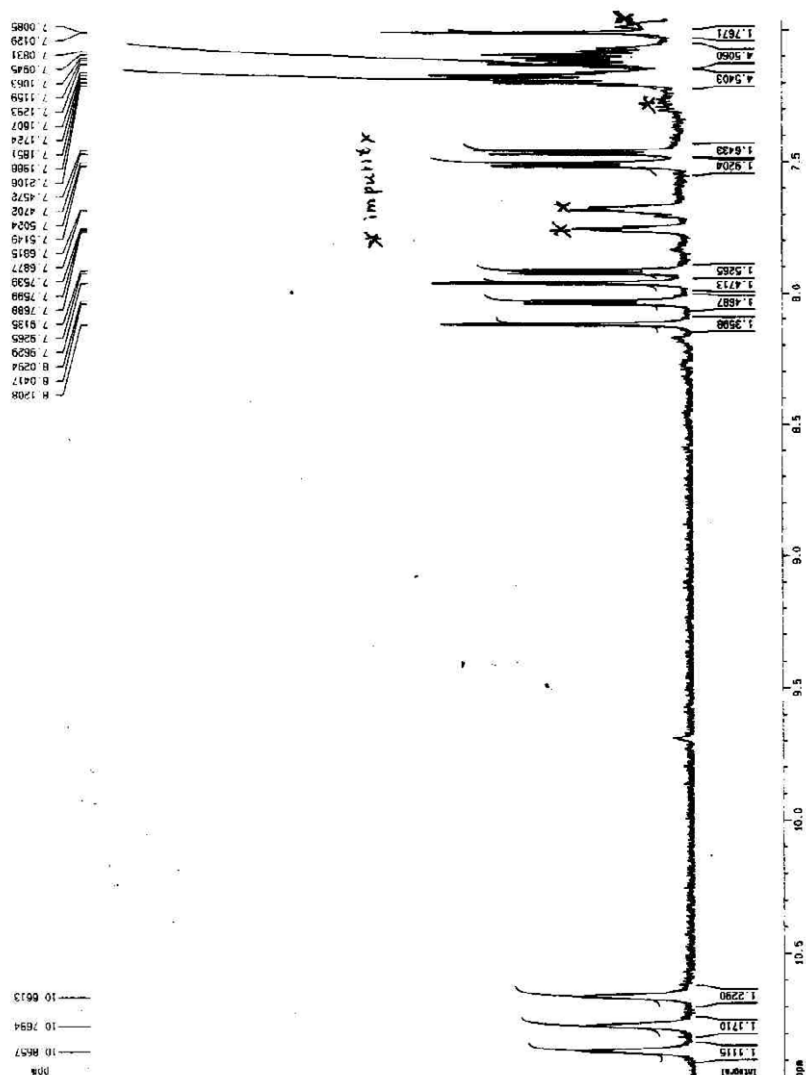

**Remark:** In the  $^1\text{H NMR}$  spectrum, some peaks from the impurity were observed. This is due to instability of **9**, but in case of the methyl ester of **9**, no decomposition occurred, thus the NMR signals from the impurity were minimum (S27-S33).

**COSY 90**

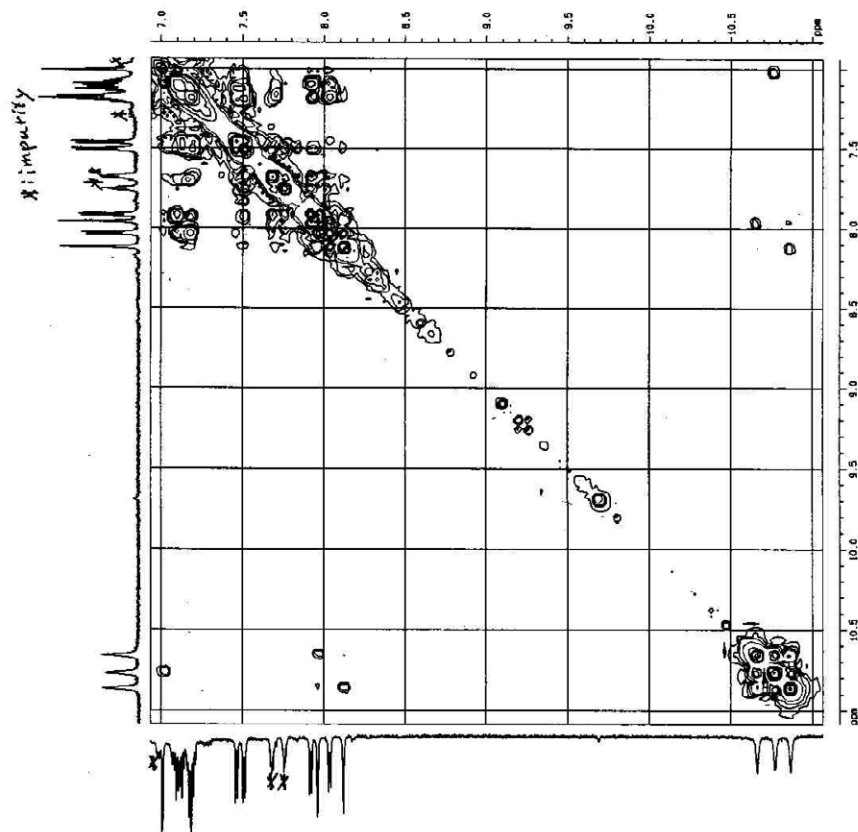

## NOESY

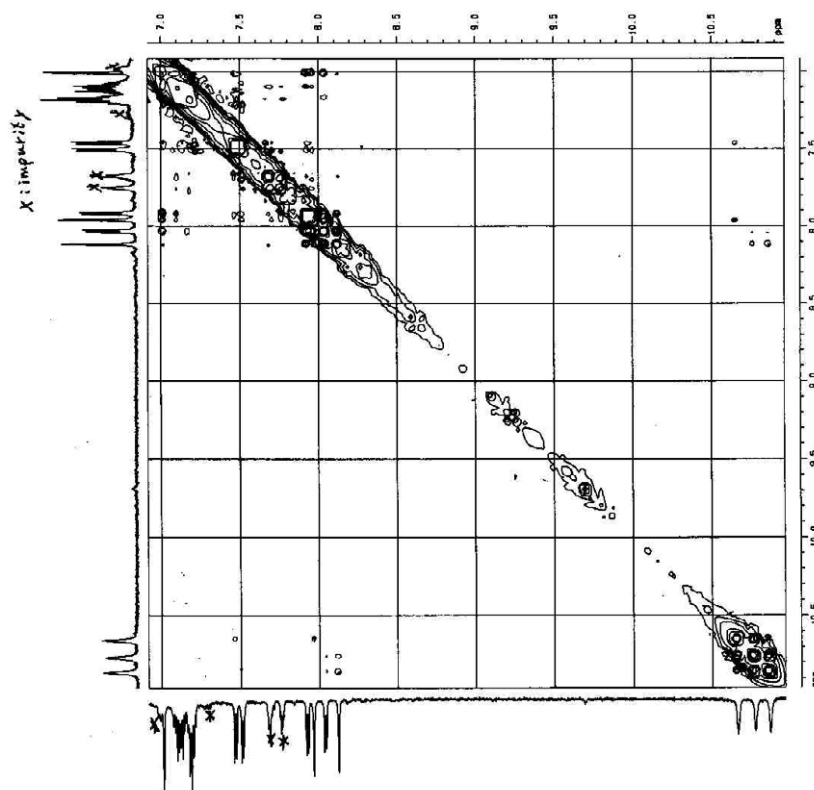

## HMQC

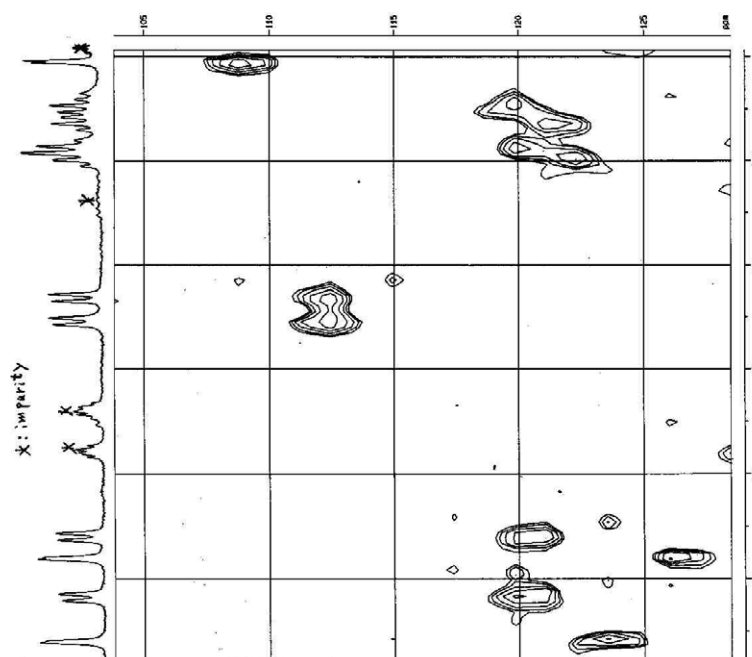



HMBC

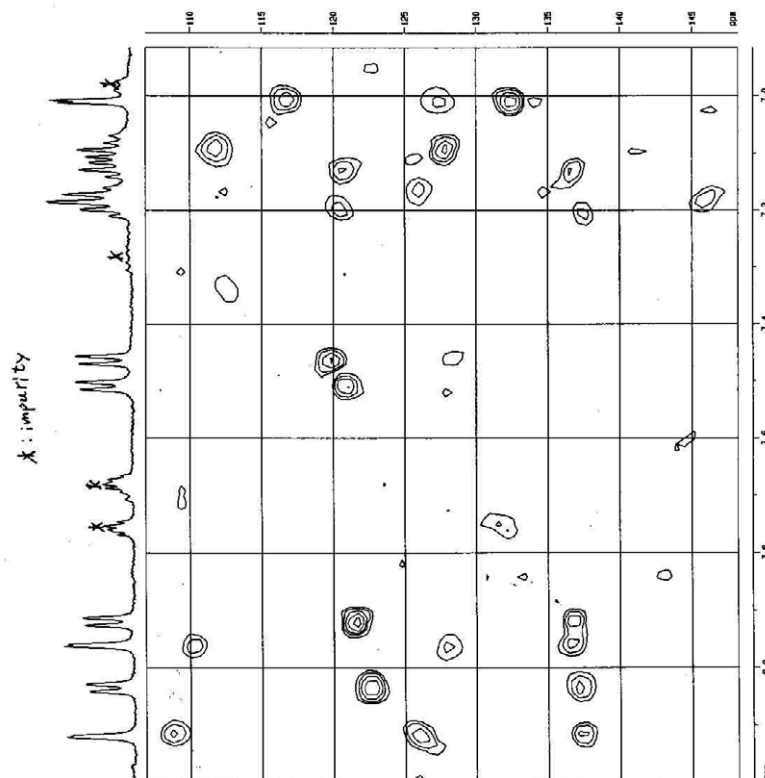

14. NMR assignments of 9

protodeoxyviolaceinic acid  
 Compound 9

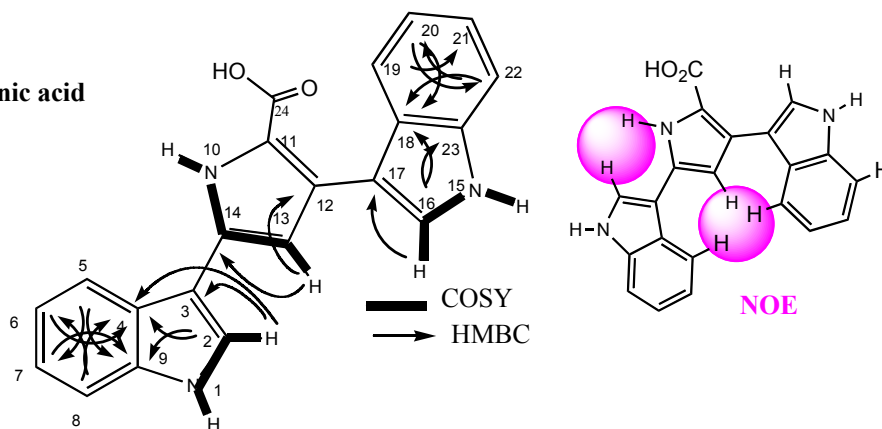

Measured at -10°C in acetone-d<sub>6</sub> with 600 MHz

$\delta_H$  and  $\delta_C$  were given in relative to the solvent peaks of 2.04 ppm and 29.8 ppm

| No | <sup>1</sup> H | <sup>13</sup> C | No | <sup>1</sup> H | <sup>13</sup> C | No | <sup>1</sup> H | <sup>13</sup> C    | No | <sup>1</sup> H | <sup>13</sup> C | No | <sup>1</sup> H  | <sup>13</sup> C |
|----|----------------|-----------------|----|----------------|-----------------|----|----------------|--------------------|----|----------------|-----------------|----|-----------------|-----------------|
| 1  | 10.87(brs)     | —               | 6  | 7.17(m)        | 120.8           | 11 | —              | 127.6 <sup>a</sup> | 16 | 7.97(d, 2.0Hz) | 126.6           | 21 | 7.12(m)         | 121.9           |
| 2  | 8.12(d, 1.9Hz) | 123.9           | 7  | 7.20(m)        | 122.8           | 12 | —              | 116.8 <sup>a</sup> | 17 | —              | 110.5           | 22 | 7.46 (d, 7.8Hz) | 112.3           |
| 3  | —              | 109.3           | 8  | 7.59(d, 7.5Hz) | 112.7           | 13 | 6.98(d, 2.8Hz) | 109.5              | 18 | —              | 128.2           | 23 | —               | 137.4           |
| 4  | —              | 126.2           | 9  | —              | 137.8           | 14 | —              | 133.2              | 19 | 7.92(d, 7.8Hz) | 120.7           | 24 | —               | 160.0           |
| 5  | 8.03(d, 7.4Hz) | 120.4           | 10 | 10.77(brs)     | —               | 15 | 10.66(brs)     | —                  | 20 | 7.09 (m)       | 120.1           |    |                 |                 |

<sup>a</sup>: The carbon signals of C11 and C12 are exchangeable

## 15. EI- and FAB-MS of 9

### 15-1. EI-LRMS

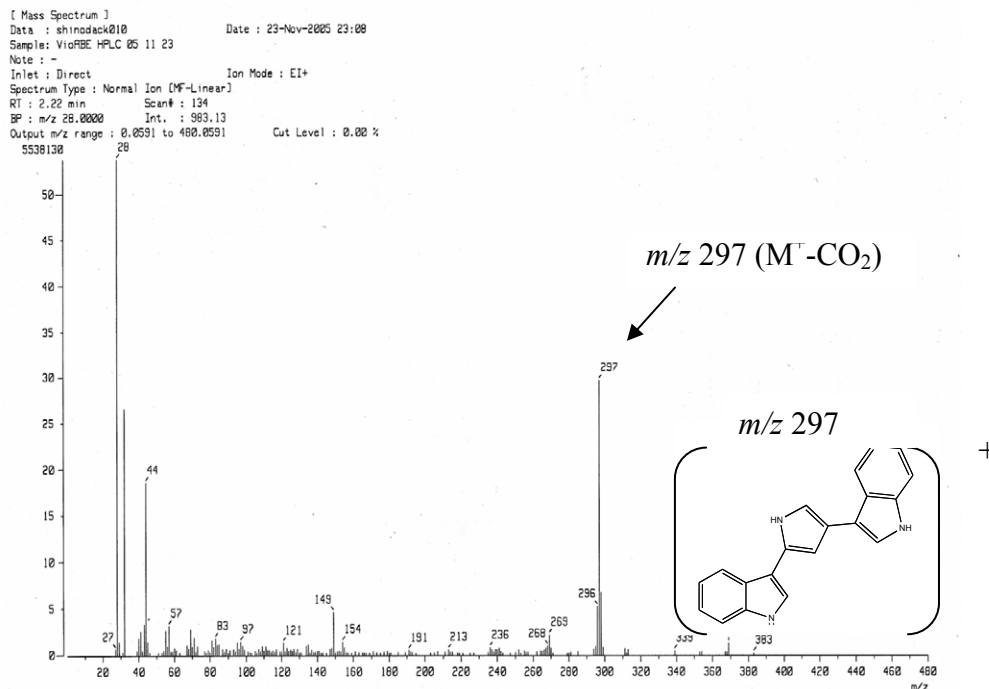

### 15-2. FAB-LRMS (negative, glycerol matrix)

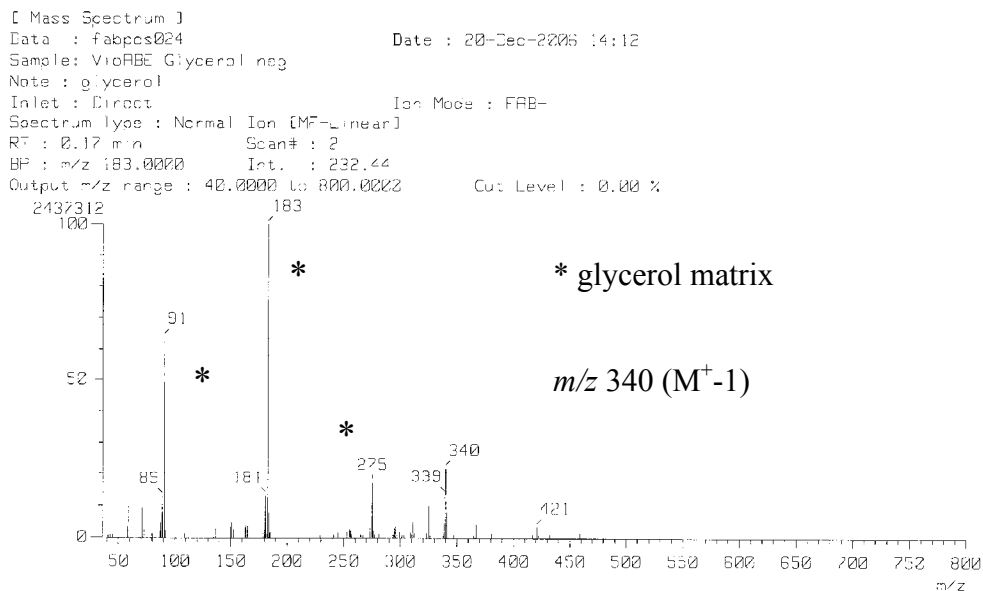

### 16. NMR Spectra of methyl ester of 9 (DMX 600) in acetone $d_6$

$^1\text{H}$  NMR

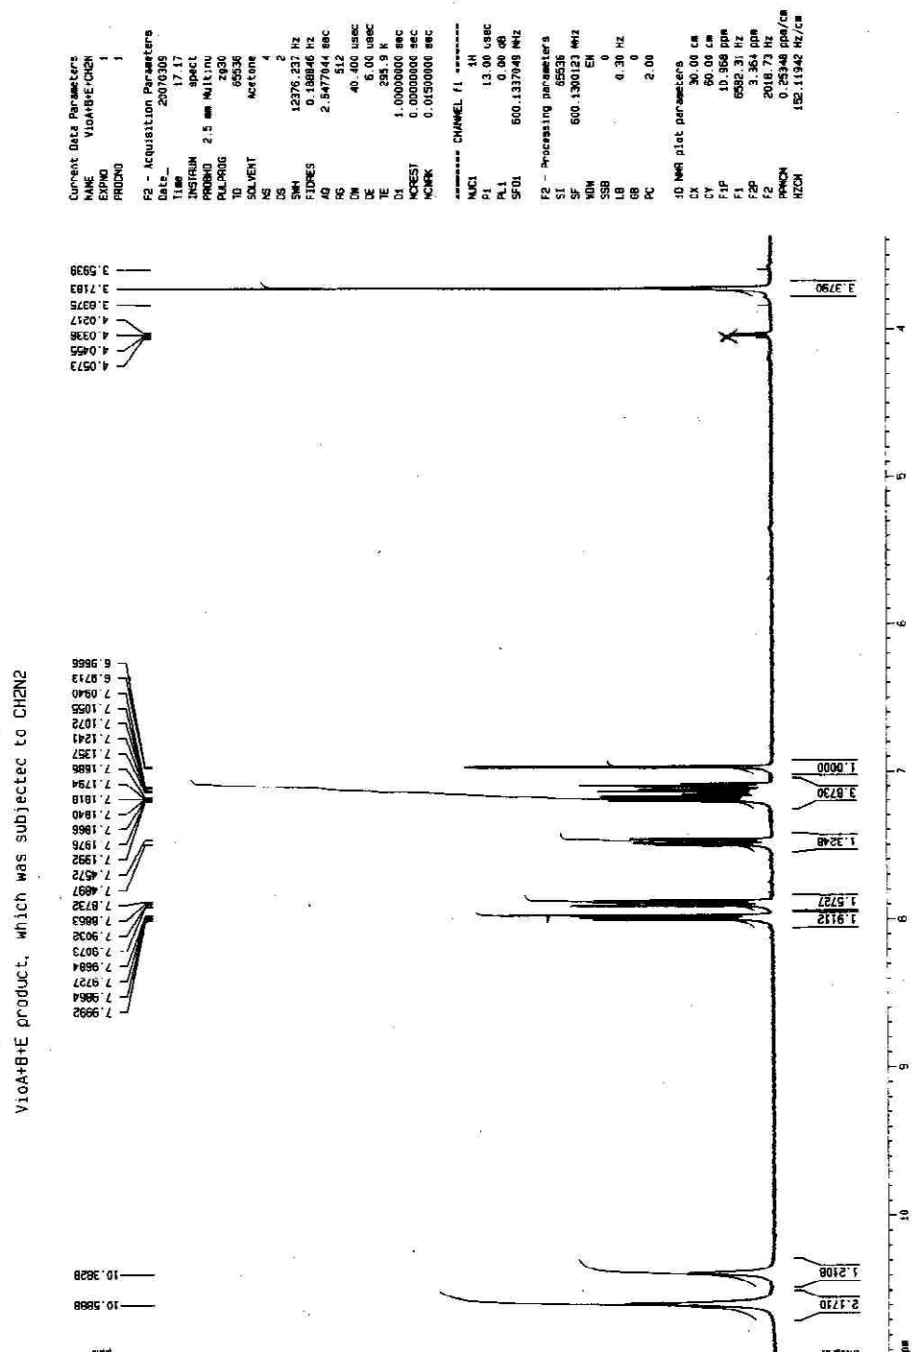

<sup>13</sup>C-NMR

ik-C40-4-1? 13C 600 C606

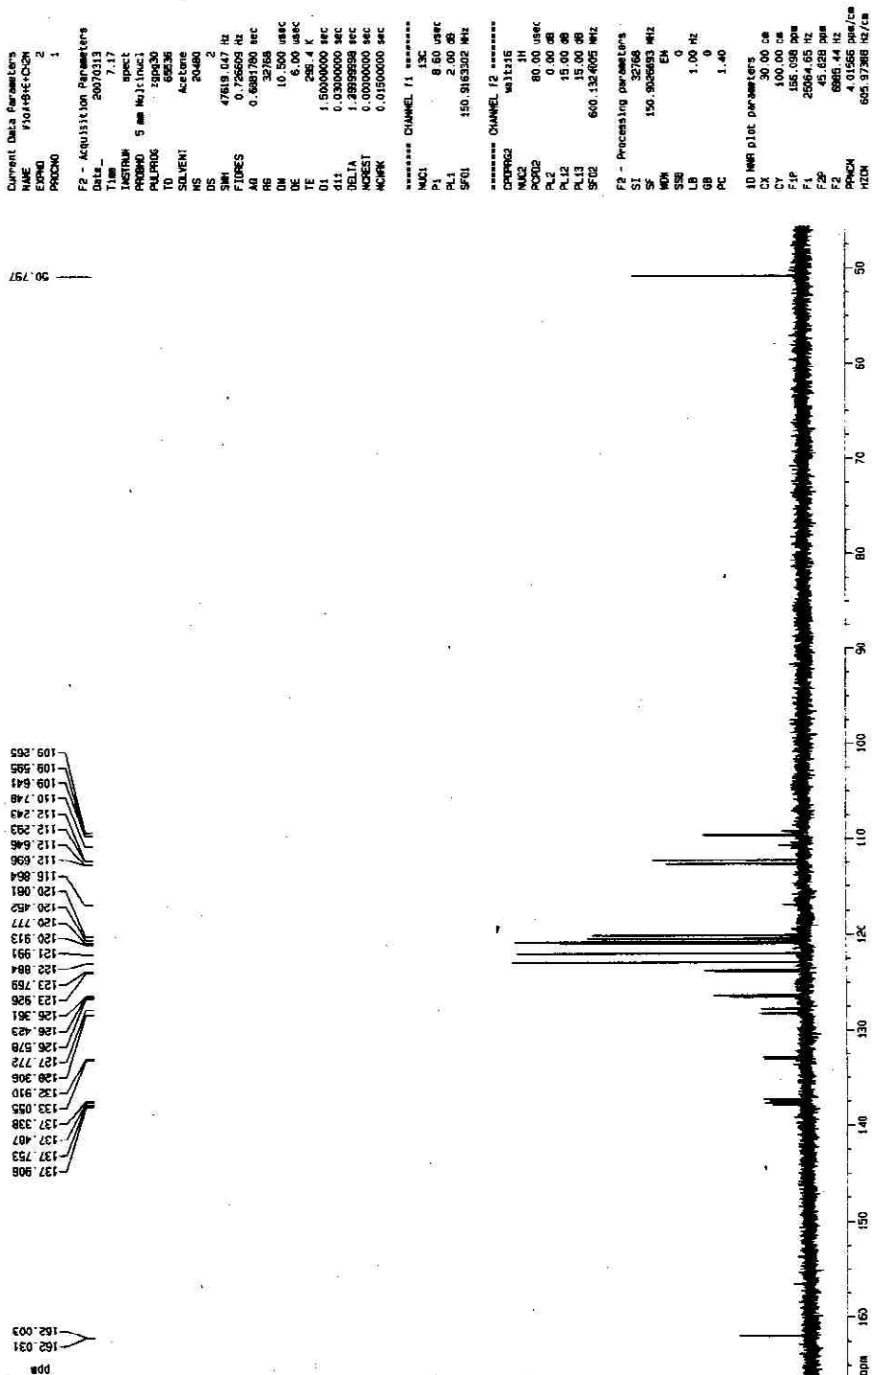

COSY 90

V10A+B+E product, which was sub j

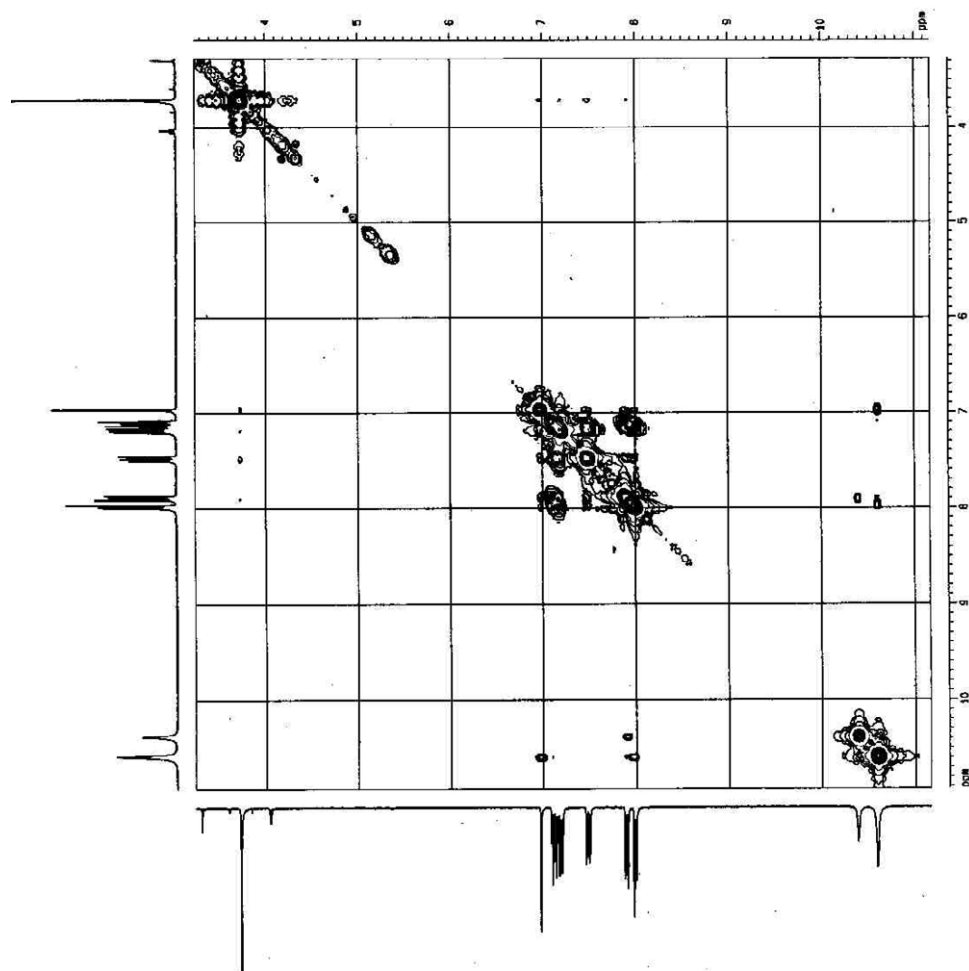

Current Data Parameters  
NAME V10A+B+E  
EXPNO 5  
PROCNO 1

F2 - Acquisition Parameters  
Date\_ 20070310  
Time 14.51  
INSTRUM spect  
PROBHD 2.5 mm Mx111mm  
PULPROG zgpg30  
TD 65536  
SOLVENT DMS-D6  
NS 8  
DS 4  
SWH 12376.232 Hz  
FIDRES 0.000585 Hz  
AQ 0.000000 Hz  
RG 327.5  
DE 4.00 uS  
TE 300.2 K  
D1 6.0000000 Hz  
D11 0.0000000 Hz  
D12 0.0000000 Hz

===== CHANNEL f1 =====  
NUC1 13C  
P1 6.00 uS  
PL1 0.00 dB  
SFO1 600.130025 MHz

F1 - Acquisition Parameters  
WDW EM  
SSB 0  
GB 0  
PC 1.00

F2 - Processing parameters  
SI 32768  
SF 600.130025 MHz  
WDW EM  
SSB 0  
GB 0  
PC 1.00

F1 - Processing parameters  
SI 32768  
SF 600.130025 MHz  
WDW EM  
SSB 0  
GB 0  
PC 1.00

2D NMR 0111 parameters  
C1H1 20.00 us  
C1H2 20.00 us  
F2.LO 60003.36100  
F2.HI 60003.36100  
F2.W 3.274 000  
F2.FC 184.181 Hz  
F2.SF 60003.36100  
F2.LF 60003.36100  
F2.PH 3.253 000  
F2.AC 184.181 Hz  
F2.PHASE 0  
F2.FREQ 200.03722 Hz  
F2.PHASE 0.38974 000  
F2.FREQ 200.03722 Hz

HOHAHA

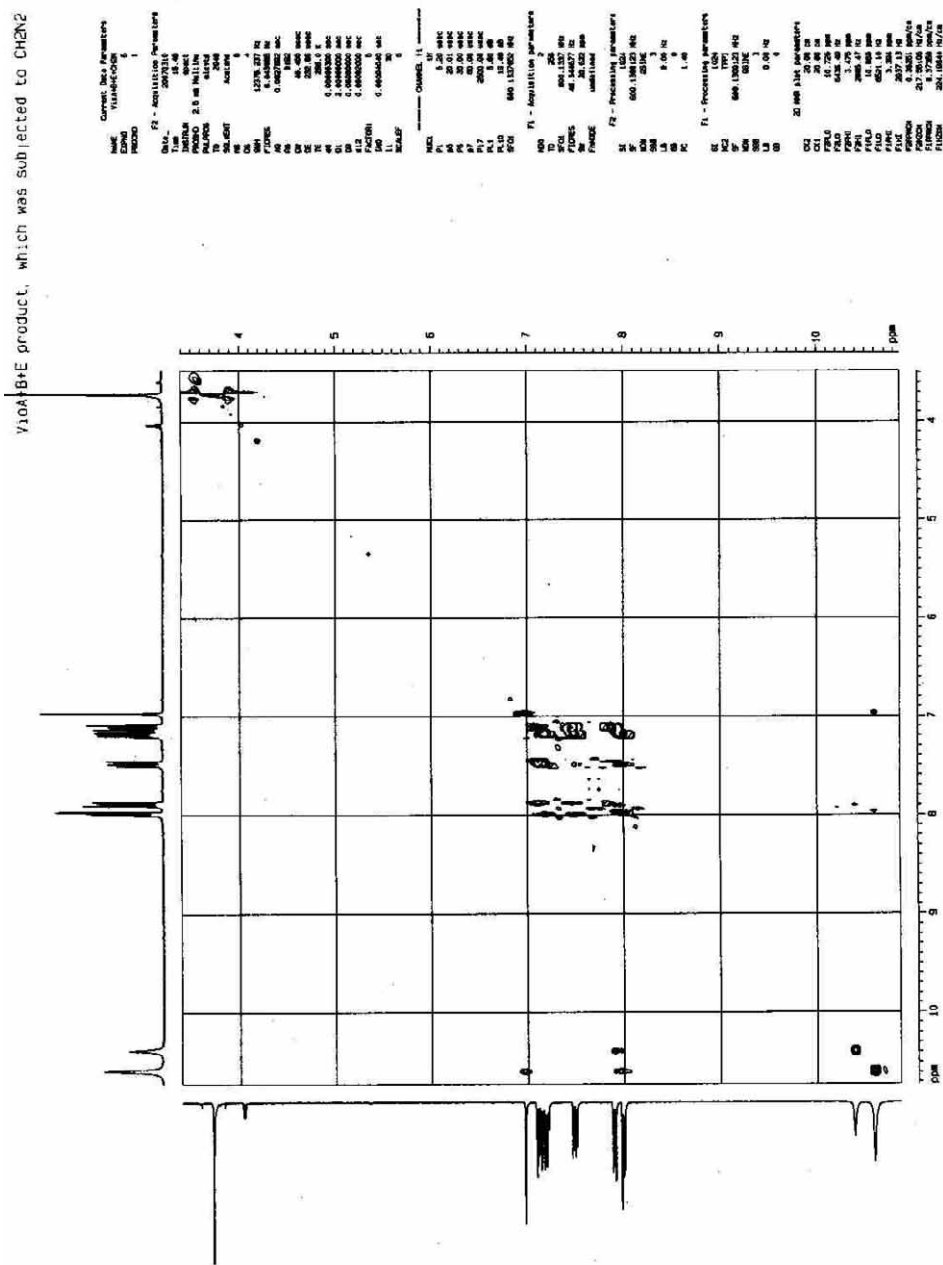

NOESY

VinA+B+E product, which was subjected to CH2N2

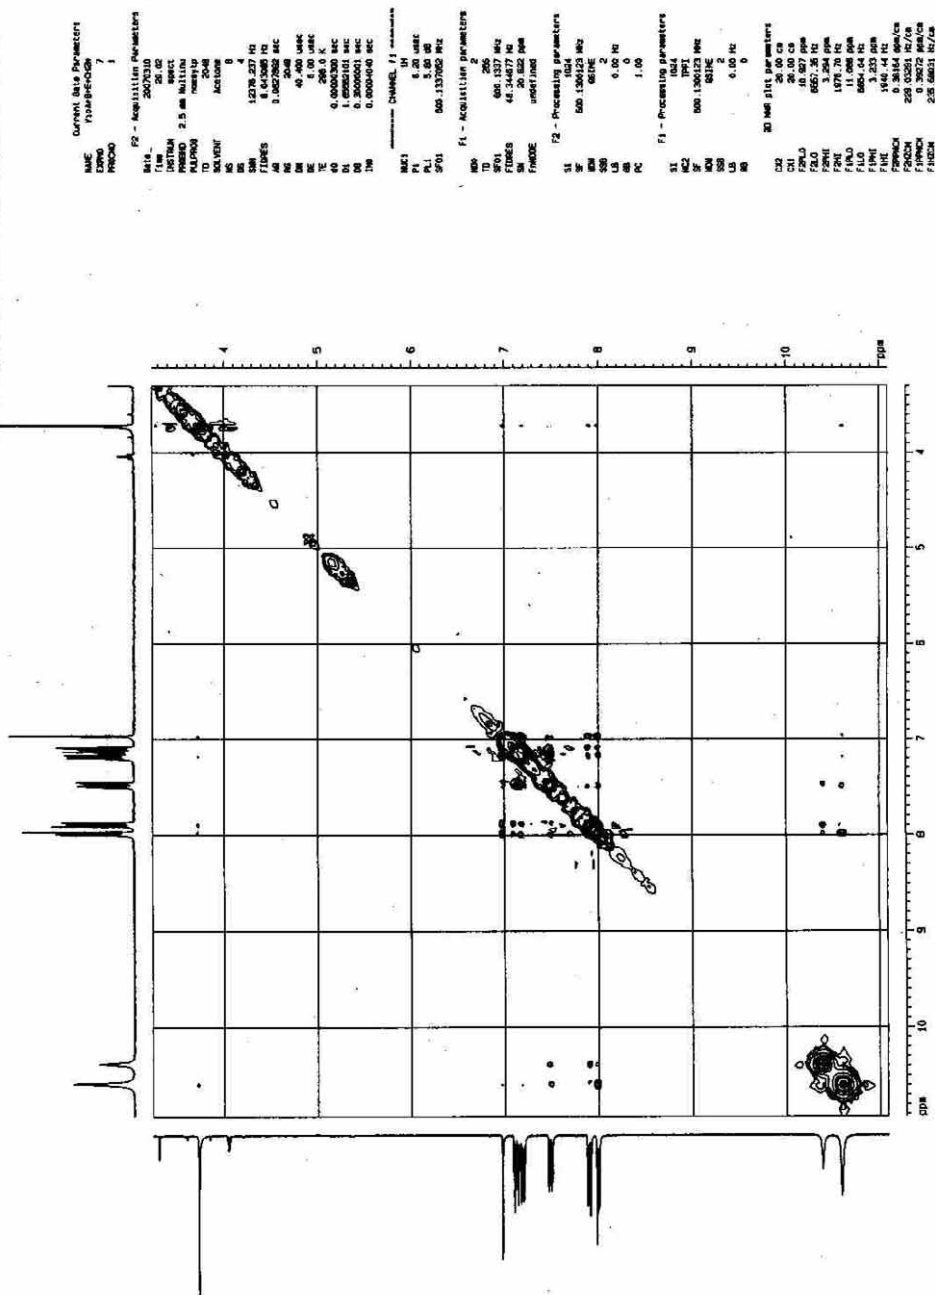

HMQC

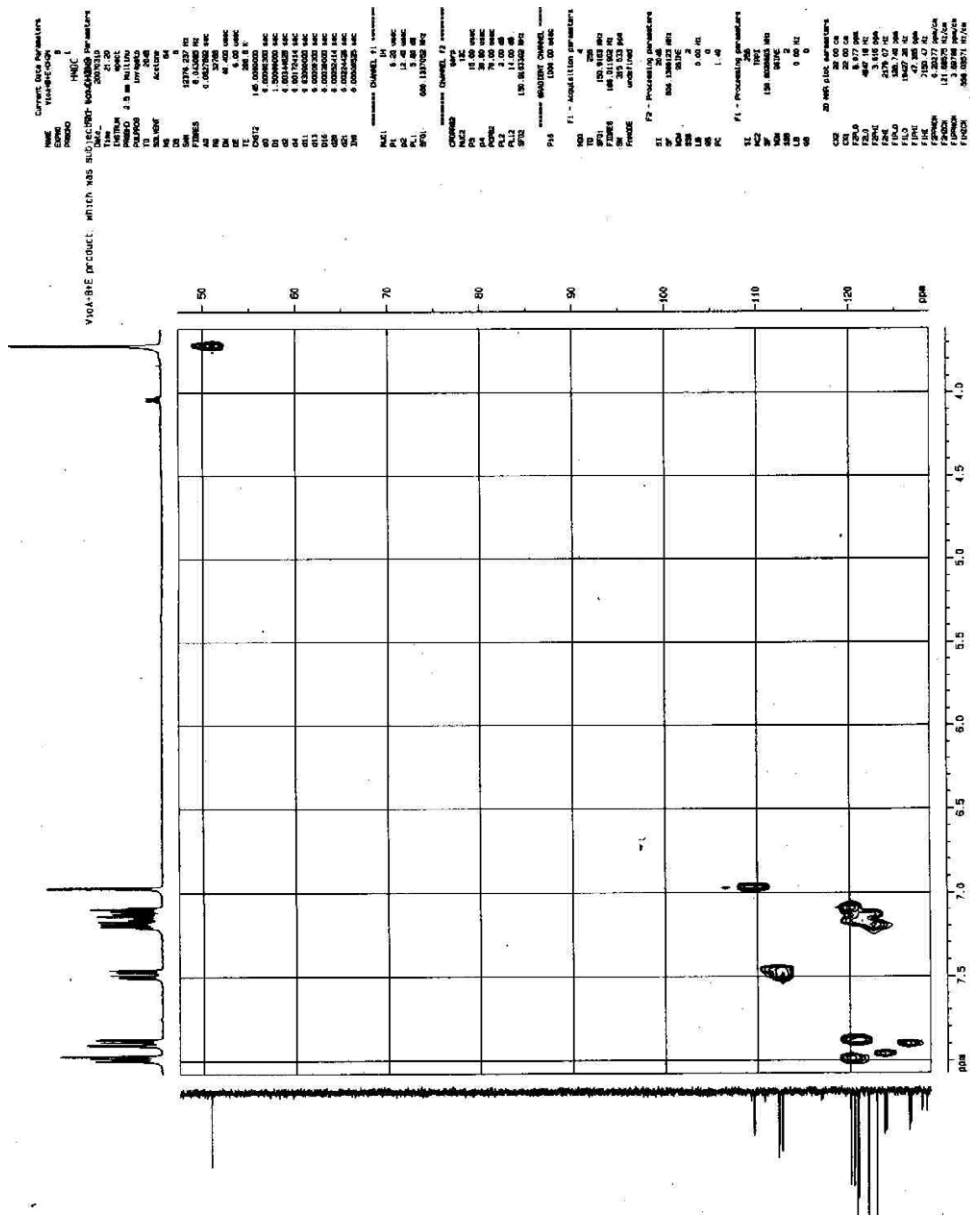



HMBC

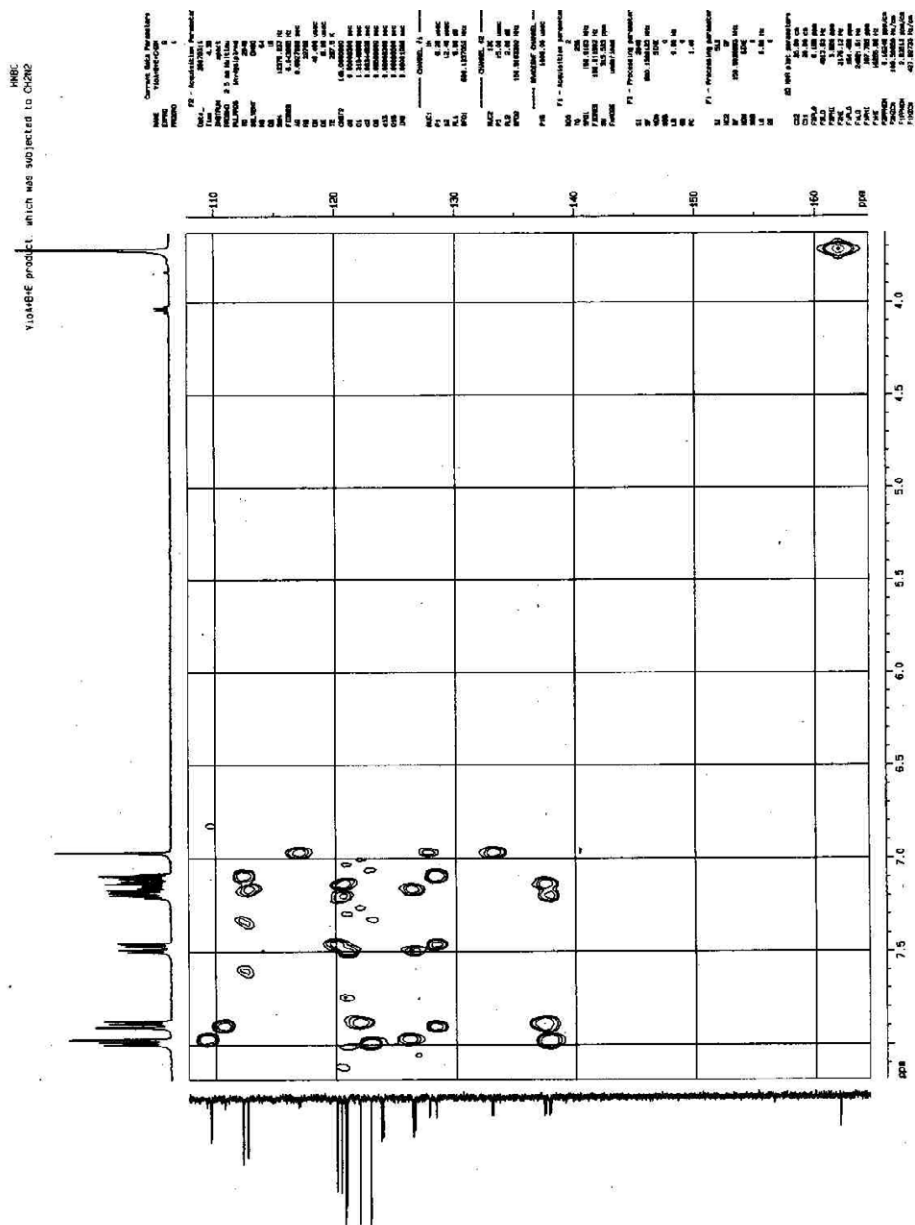

### 17. NMR assignment of methyl ester of 9

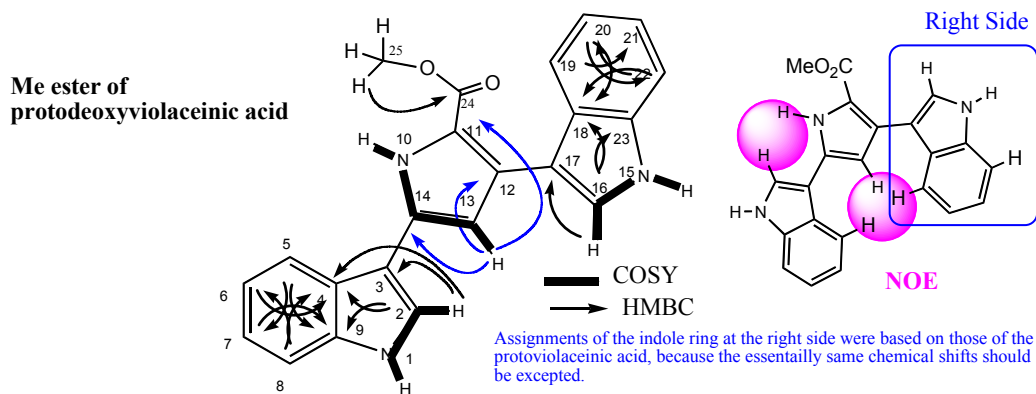

Measured at 23°C (room temp.) in acetone-d<sub>6</sub> with 400 MHz

$\delta_H$  and  $\delta_C$  were given in relative to the solvent peaks of 2.04 ppm and 29.8 ppm

| No | <sup>1</sup> H | <sup>13</sup> C | No | <sup>1</sup> H | <sup>13</sup> C | No | <sup>1</sup> H | <sup>13</sup> C    | No | <sup>1</sup> H | <sup>13</sup> C | No | <sup>1</sup> H  | <sup>13</sup> C |
|----|----------------|-----------------|----|----------------|-----------------|----|----------------|--------------------|----|----------------|-----------------|----|-----------------|-----------------|
| 1  | 10.57(brs)     | —               | 6  | 7.18(m)        | 120.9           | 11 | —              | 127.7 <sup>a</sup> | 16 | 7.91(d, 2.4Hz) | 126.6           | 21 | 7.13(t, 7.9Hz)  | 121.9           |
| 2  | 7.97(d, 2.8Hz) | 123.9           | 7  | 7.20(m)        | 122.8           | 12 | —              | 116.9 <sup>a</sup> | 17 | —              | 110.7           | 22 | 7.47 (d, 7.9Hz) | 112.2           |
| 3  | —              | 109.2           | 8  | 7.51(d, 7.6Hz) | 112.6           | 13 | 6.98(d, 2.8Hz) | 109.5              | 18 | —              | 128.2           | 23 | —               | 137.4           |
| 4  | —              | 126.3           | 9  | —              | 137.8           | 14 | —              | 133.0              | 19 | 7.89(d, 8.0Hz) | 120.7           | 24 | —               | 162.0           |
| 5  | 7.99(d, 7.7Hz) | 120.4           | 10 | 10.60(brs)     | —               | 15 | 10.37(brs)     | —                  | 20 | 7.09(t, 7.9Hz) | 120.1           | 25 | 3.72(3H,s)      | 50.78           |

<sup>a</sup>: The assignments may be exchangeable.

### 18. EI-LRMS and EI-HRMS of methyl ester of 9.

HREIMS, C<sub>22</sub>H<sub>17</sub>N<sub>3</sub>O<sub>2</sub>, Calc. 355.1321, Found, 355.1319.

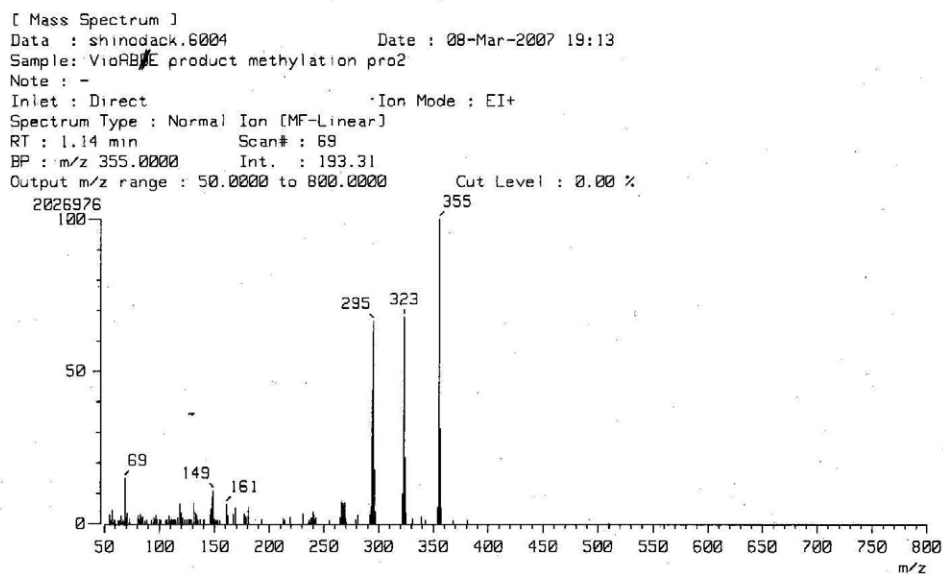

## 19. Electronic spectrum of methyl ester of 9

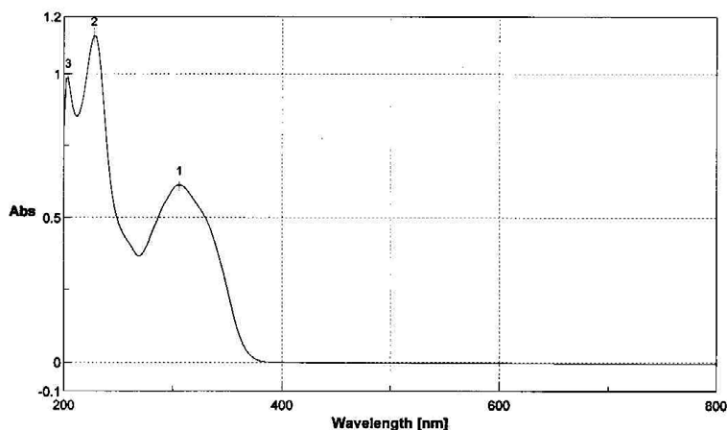

Optical pathlength; 1 cm, Concentration 0.638 mg/50 ml MeOH

## 20. Homologous alignment of VioA , VioC and VioD

### VioA;

vioA 418 a. a.

L-amino acid oxidase [Synechococcus elongatus PCC 6301]. 495 a. a.

identities 15.5% positives 32.1% gaps 18.1%

L-amino acid oxidase [Trimeresurus stejnegeri]. 516 a. a.

identities 14.4% positives 33.1% gaps 20.0%

vioA -----MKHSSD|C|V|G|A|

Synechococcus --MRFRRRFLQSSLGAAATTG--LAGTLAAGGQAQTRSTPVR-----KRSVLVLGAG

Trimeresurus MNVFFMFSLFLAALGSCADDRNPLEECFRETDYEEFLE|ARNGLKATSNPKHVVI|VGAG

: : : \*\*

vioA |SGLTCASHLLDSPACRGLSLR|FDMQAEAGGR|RSKMLDGKAS|ELGAGRYSPLHPHF

Synechococcus MAGLTAALSLLR----RGHQVTV|EYQNR|GGRLLSVPLKG--QGFSEAGGGHFRANMPYV

Trimeresurus MSGLSAAYVLAG----AGHEVTVLEASERAGGRVRTYRNDEEGWYANLGPMLPEKHR|V

: : \* : . \* \* : : : : : \* : : : : : . . . . .

vioA QSAMQHYSQKSEVYP-----FTQLKFKSHVQKQLKRAMN----ELSPRLKEHGKESFLQ

Supplementary Material (ESI) for Chemical Communications  
 This journal is (c) The Royal Society of Chemistry 2007

Synechococcus LSYIRHFKLPLLTLN--DGLPRYLFDGKTADAADLSRWP----WDLAPQERRVSVASLLN

Trimeresurus REYIRKFNLQLNEFSQENDNAWHFVKNIRKTVGEVKKDPGVLYPKPSEEGKSAEQLYE

. : : : . : : : : \* . . . : : :

vioA FVSRYQGHDSAVGMIRSMG--YDALFLPDISAEMAYDIVGKHPEIQSVTDNDANQWFAA-

Synechococcus TYLILNGLDQDQVLDANWPDAAQIQQLDNLTLSQLIRQVGGSEAFIQLLDAHGGTFTSSS

Trimeresurus ESLRKVEKELKRTNCSYILNKYDYSTKEYLKEGNLSPGAVDMIGDLMNEDAGYYVSFI

: : : : \* : : : : : : :

vioA -----ETGFAGLIQG---IKAKVKAAG--ARFSLGYRLLSVRTDGDGYLLQ

Synechococcus PALGVIPLDAYHFQDQNLFRIQGGNDRLPKAMAAAIGSERILDAPVVAIDQQANRATVT

Trimeresurus ESMKHDDIFAY---EKRFDEIVDGMKLPSTMYRAIEEKVHFNAQVIKIQKNAEETVT

: : : \* : : \* : : : : : : :

vioA LAGDDGWKLEHRTRHLILAIPPSAMAGLNVDPEAWSGARYGSLPLFKG----FLTYGEP

Synechococcus VK---DGRTFQGDALISTIPFTVLEAVRPGWSAGKRRMFAEMEWQTVKVI AQTRSP

Trimeresurus YHTPEKDTSFVTADYVIVCTTSRAARRIKFEPPLPKKAHALRSVHYRSGTKIFLTCTKK

: \* . . . : . . . : . . . : . . .

vioA WWLDYKLDQ-VLIVDNPLRKIYFK-----GDKYLFFYTDSEMANYWRG-CVAEGEDGY

Synechococcus VWLAQNVHGWPMAGSDRPWERVIDITGNEGGYGNTFFYLNGRNKDAMLARPKSERAQA

Trimeresurus FREDEGHGG-KSTDLPSRFIYYPNHNFTSGVGVIIAYIGDDANFFQALDLKDCGDIV

: . . \* \* . : \* : \* . : . . : :

vioA LEQIRTHLASALGIVRERIPQPLAH---VHKYWAHGVEFCRSDIDHPSALSHRDSGII

Synechococcus VDQFRSDLPDLFDEVVTLADFAWGEQPWIRGSFEG-----PPLGGAWMIREWTTPEGLI

Trimeresurus INDSL-LIHQLPREEIQTFYCPSMIQKWSLDKYAMGGITTFPTYQFQHFSEALTSVDR

: : : : : : : : : : \*

vioA ACSDAYTEHCG-WMEGGLLSAREASRLLLQRIAA-----

Synechococcus HFAGDFTTMKSGWVEGIESGLRAARQIDPGAQPEADTFLRQEQRCN

Trimeresurus YFAGEYTAHAHGWIDSSIKSGLTAARDVNRASENPSGIIHLSNDEL-

: : \* \* : : : \* \* \* : :

## VioC

Kmo : kynurenine 3-monooxygenase from *Homo sapiens* (identity; 26%, positives 47%, gap; 4%)

Phbh : *p*-hydroxybenzoate hydroxylase from *Pseudomonas putida* (identity 18%, positive 34%, gap 7%)

Large letters: amino acid residues

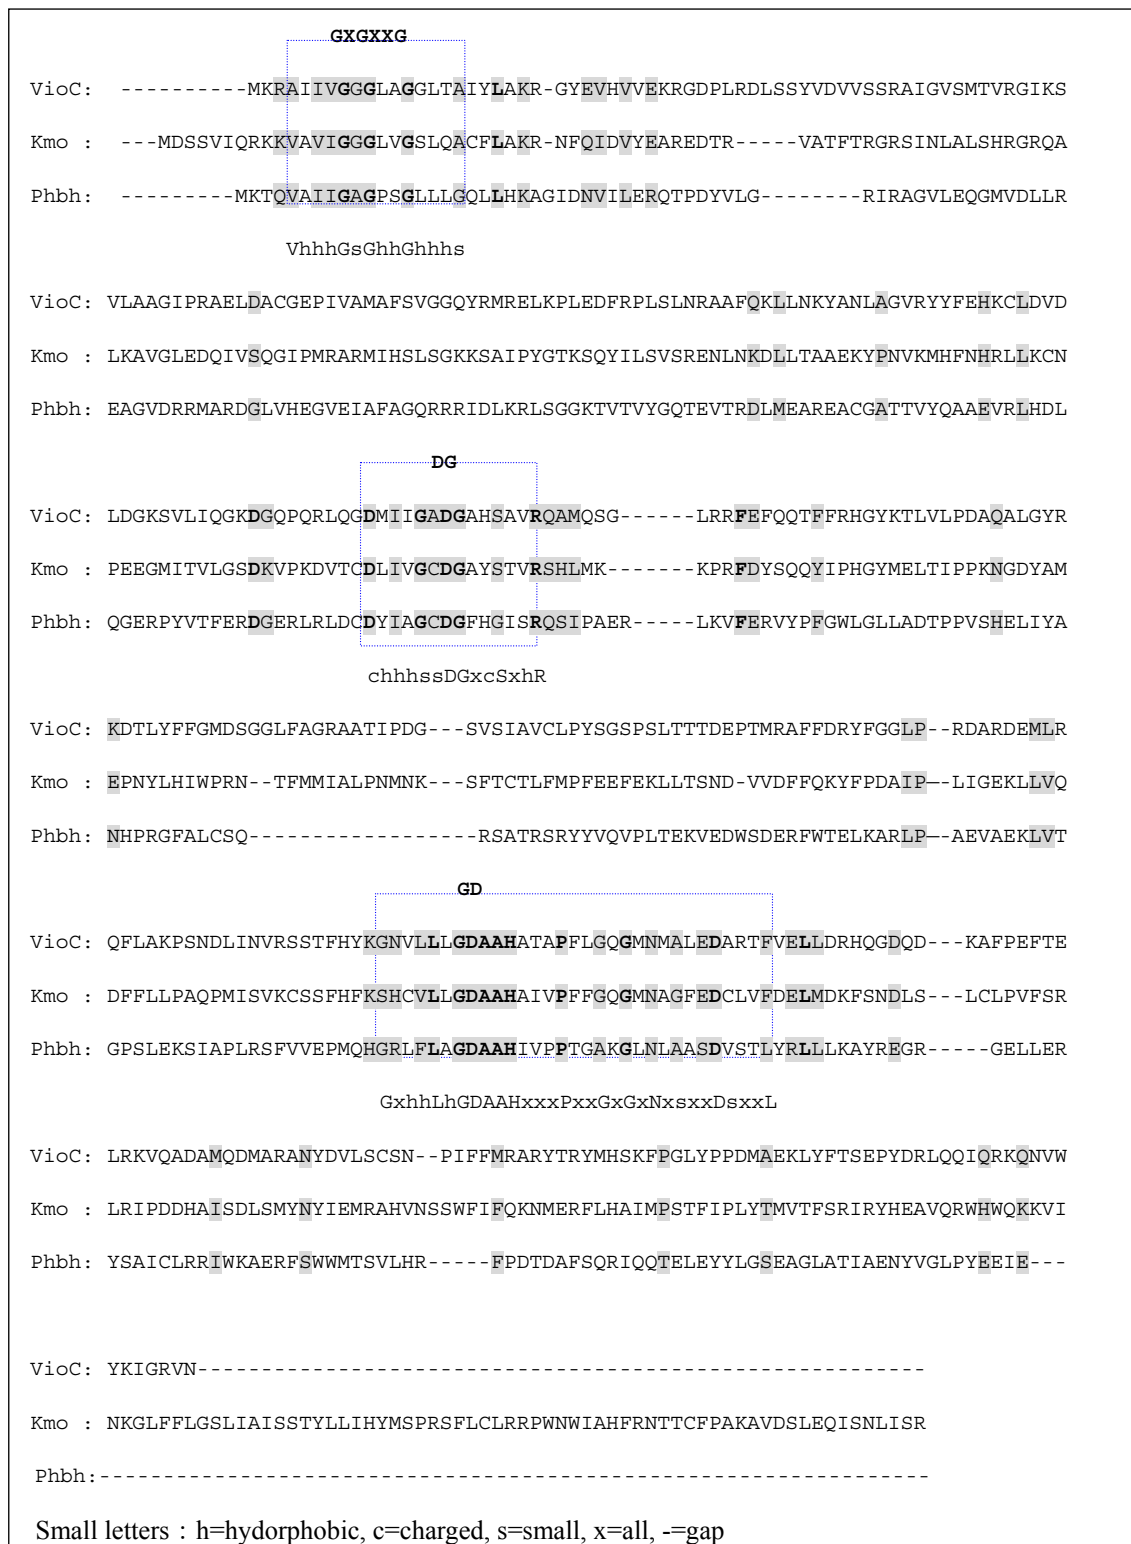

## VioD.

salicyl-CoA 5-hydroxylase [Streptomyces sp. WA46] 517a. a.

identities 23.9% positives 39.3% gaps 29.2%

2-polyprenyl-6-methoxyphenol hydroxylase and related FAD-dependent oxidoreductase [Marinobacter sp. ELB17].

411 a. a.

identities 16.2% positives 35.5% gaps 12.3%

vioD ----MKILVIGAGPAGLVFASQLKQ-----ARPLWAIDIVEKNDEQ

salicyl ----MKVACIGAGPGGLFFATLLKR-----SRPDAEVVVFERNRPD

2-poly MTQAFDI AVVGAGMVGAAATGLGRNGFRVALIDFADAPEFVPGSTPDIRVSALSAGSER

.. : :\*\*\* \* :\* \* : : \* : . . . .

vioD EVLGWGVVLPGRPG-QHPANPLSYLDAPERLNPQFLEDFKLVHHNEPSLMSTGVLLCGVE

salicyl DTFGFVVFSDATL-DAIDAADPVLSEALEKHGRHWDDIEVRVHGERERVG-GMGMAAVV

2-poly YLQGLKAWDNVLMRATPYRRLAVWDQSSHPLTRLLPKPLARVEFNADKLG-ASHLGHIV

\* . . . . . : . . . . . : . . . . .

vioD RRGVLHALRDKCRSQGIAIRFESPLLEHGELPLADYDLVVLANGVNHKT-AHFTEALVPO

salicyl RKTLLSLLQERARAEGVQMRFAQDEVDRP--AELDDFDLVVCDGANSRFRTLFADDFGPT

2-poly ENSVTQAALWQAASTQPNI TLMPGVAVTNLTQNHDAQLDLSNATAITATLVVGADGAQS

. . : . : : : : \* . : . . . . .

vioD VDYGRNKYIWYGTSQLFDQMNLVFRT-HGKDI FIAHAYKYSDTMSTFIVEGSEETYARAR

salicyl AEVASAKFIWFGTTFYDFGLTFVHQD-GPHGVFAAHAYPISDSLSTFIVETDADSWARAG

2-poly RVRDLAGIGVTRSQYDQAMVMSVRYRGAVEDITWQGFPLSPRAFPLPLHTAGEEFPGES

: : : : : : : : \* . : : : : : .

vioD LG-----EMSEEASAEYVAKVFQAEELGGHG-----LVSQPGLGWRNFMTLSHDRCHD

salicyl LDAFDPATPLGMSDEKTKSYLEDLFRAQIDGHP-----LVGNNSR-WANFATRARSWRS

2-poly WGSLVVYDAPARLAQLKAMP IEQLMAEIQGEFPQPLPELTHIDTRASFP IARQHAKHYIQ

. . : . : : : : \* . : . . . . .

vioD GKLVLLGDALQSGHFSIGHGTTMAVVVAQLLVKALCTEDG-----VPAALKRFEERALP

salicyl GKWVLLGDAAHATAHFSVSGGTMAMEDAVALAETLGEASRS-----VPEALDLYEERRRP

Supplementary Material (ESI) for Chemical Communications  
This journal is (c) The Royal Society of Chemistry 2007

2-poly GRVVLGDAAHITNPLAGQGVNLGFQDAQCLQQLLIVARNNGTDLADPDLLSQYEHQRRP

\*: \*\* \*\*\* : : \* \* . : . \* \* : \* \* \* : \* : \*

vioD LVQLFRGHADNSRVWFETVEERMHLSSAEFVQSF DARRKSLPP-----

salicyl KVERIQNSARPSLSWWEHFGRYVRSFDAPTQFAFHFLTRSIPRGKLAVRDAAYVDRVDGW

2-poly ANRRMMLAMDVFYHLFSNRVPPLHLLRNGLGAAQALPFARNR-----

. : . : . : . : . :

vioD -----MPEALQNLRYALQR-----

salicyl WLRHHEAGPLKTPFRVGPYRLPTRRVTVGDDLLTGTGTGIPMVPFSGQPFAGVWIDAP

2-poly -----VARYAMGLD-----

.

vioD -----

salicyl DTEEGLPLALDQVRETAEGVLLVGVRGGTALTRVLVAEEARLAHSLPAAIVGAYDDDTA

2-poly -----

vioD -----

salicyl TTLVLSGRADLVGGTK

2-poly -----

## 21. FAD cofactor involved in VioA, C and D.

21-1: SDS-PAGE of the expressed proteins and the purified VioACD

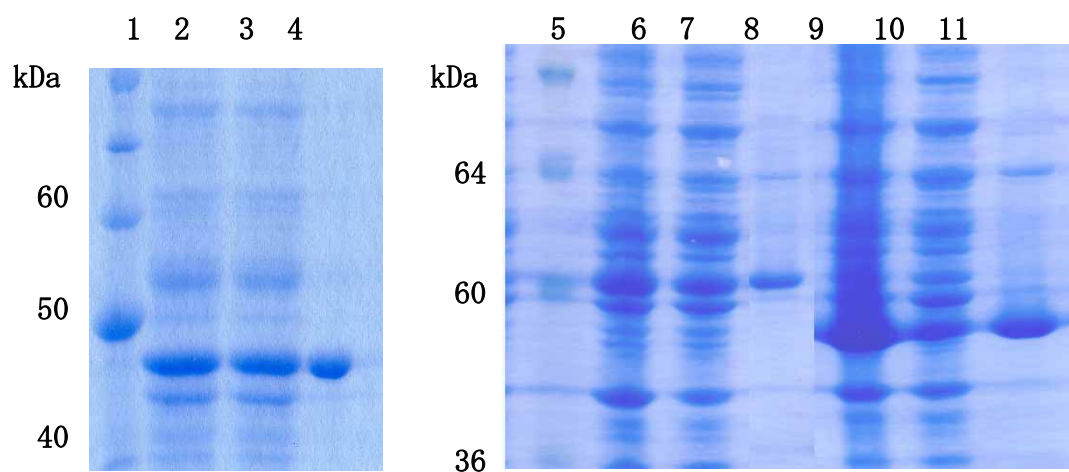

- Lane 1** :MW marker
- Lane 2** : pET16b-vioA, total protein
- Lane 3** : pET16b-vioA, soluble protein
- Lane 4** : purified VioA with Ni-NTA
- Lane 5** : MW marker
- Lane 6** : pET16b-vioC, total protein
- Lane 7** : pET16b-vioC, soluble protein
- Lane 8** : Purified VioC with Ni-NTA
- Lane 9** : pET16b-vioD, total protein
- Lane 10** : pET16b-vioD soluble protein
- Lane 11** : purified VioD with Ni-NTA

21-2: Electronic spectra of authentic FAD (A) and the supernatant (B) obtained by heating the purified VioA.



(A)

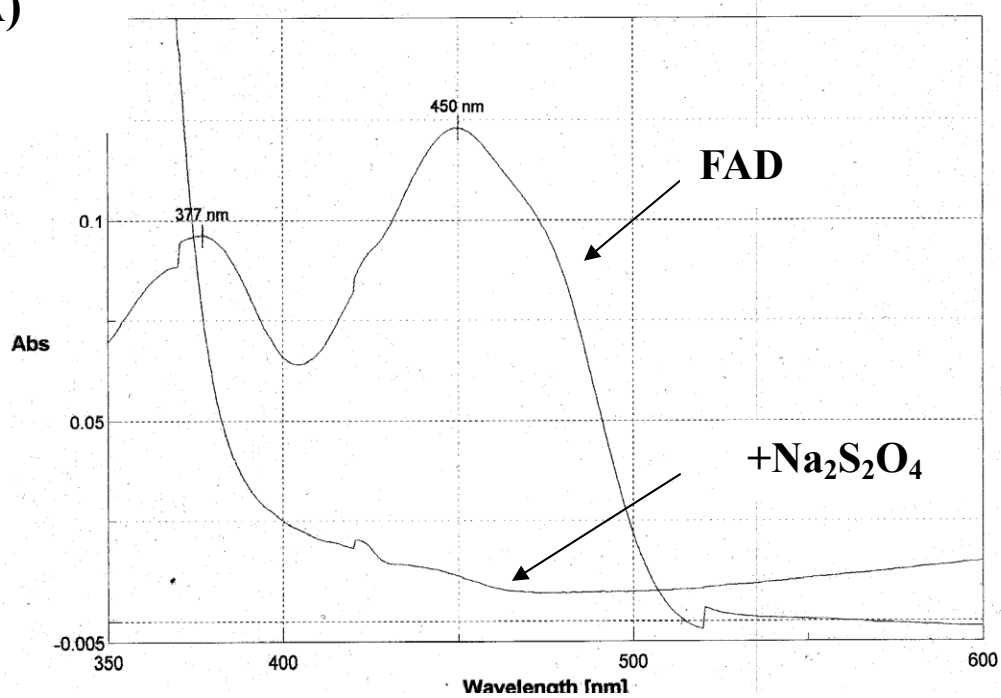

(B)

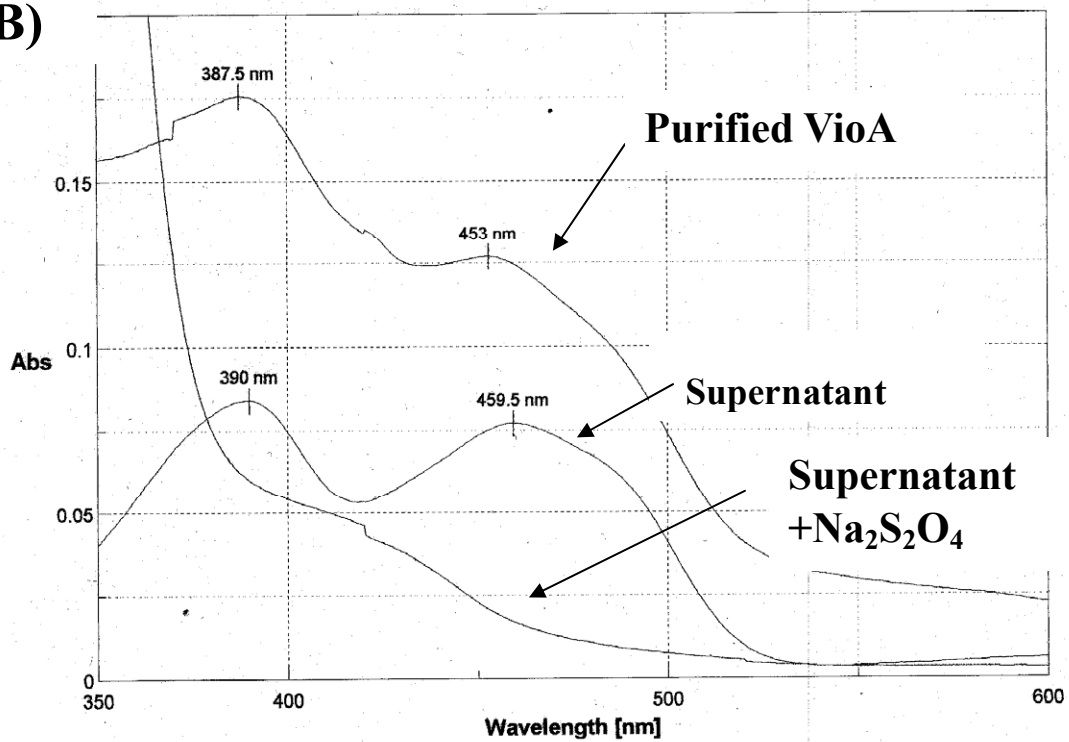

The similar electronic spectra were also obtained for VioC and VioD.

21-3: HPLC profiles of the supernatant obtained after heating the purified VioC at 100°C for 10 min.

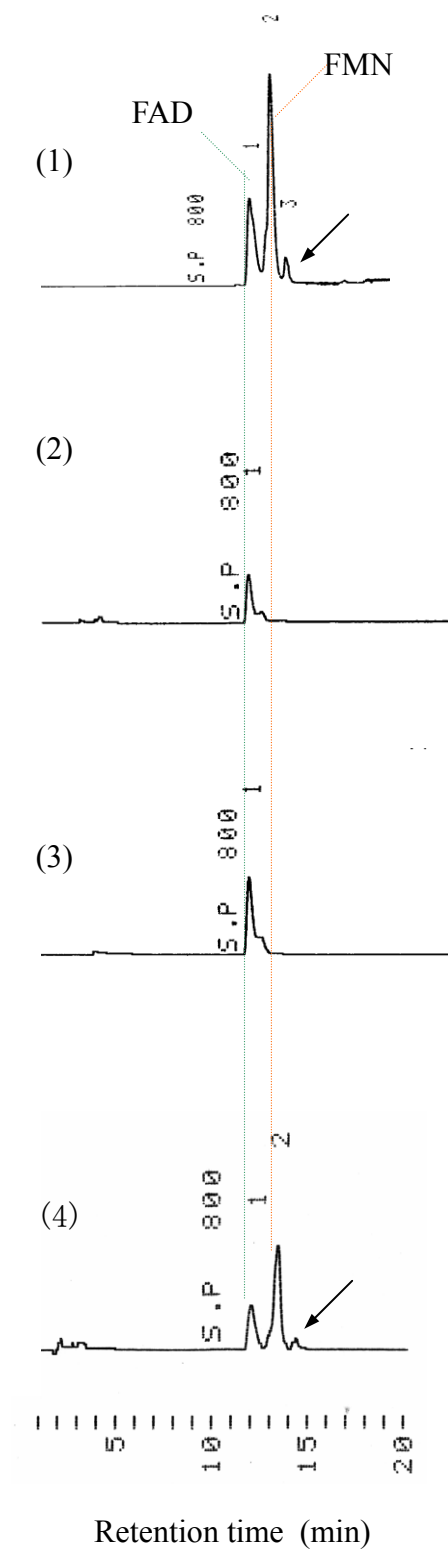

HPLC conditions. Column; SHISEIDO, CAPSELL PACK C18 (Type:MG 5  $\mu$ m), 4.6 mm I.D. x 150 mm; detected at 448 nm. The HPLC patterns were obtained according to the following gradient program.

**Table** Gradient Program

|     | min  | Solvent A (%) | Solvent B(%) | Flow(ml/min) |
|-----|------|---------------|--------------|--------------|
| (1) | 0    | 100           | 0            | 0.8          |
| (2) | 0.5  | 100           | 0            | 0.8          |
| (3) | 17.5 | 75            | 25           | 0.8          |
| (4) | 18.0 | 100           | 0            | 0.8          |
| (5) | 23   | 100           | 0            | 0.8          |

Solvent A : 15 % MeOH/6mM H<sub>3</sub>PO<sub>4</sub>, Solvent B : MeOH

- (1): sample injection
- (2) and (3): 1.25 % MeOH linear gradient
- (4) and (5): the column washing, then back to (1)

Arrow indicates the impurity involved in the commercially available FMN.

- (1) Co-injection of authentic FAD and FMN.
- (2) The supernatant obtained by heating the purified VioC
- (3) Co-injection of the supernatant and authentic FAD
- (4) Co-injection of the supernatant and authentic FMN.

The similar HPLC analyses showed that VioA and VioD were also a flavo-protein containing FAD, but not FMN.

The ratio of each of VioA and VioD to FAD was determined to be nearly 1.0. To the cell-free extracts of VioA and VioD, which were obtained from 100 ml-culture, was added 0.5 mg FAD/10 ml of the cell-free extract, and incubated for 15 min at 25°C. After purification with Ni-NTA column, the purified VioA and D were heated at 100°C for 10 min. The FAD content of the supernatant was determined by the HPLC described above. However, in the case of VioC, the released FAD amount of the supernatant was very low even after the preincubation with the supplemented FAD, the ratio of the released FAD to VioC was ca 0.2:1. This result suggests that FAD may more tightly bind to VioC. Further study is necessary to clarify this point.
